# Supplementary material for: Changes in mercury content in oysters in relation to sediment and seston content in the Colombian Caribbean lagoons
Source: PeerJ. 2025 Oct 24;13:e19868. doi: 10.7717/peerj.19868 (PMC12558159; doi:10.7717/peerj.19868)
Supplement: Supplemental Information 1 — Raw data in the results of physicochemical variables measured at a depth of 0.5 m in the water column, and percentage of organic matter, redox potential and silt content in the sediment. [file peerj-13-19868-s001.xlsx]

## Sheet: Hoja1
Sampling	Station	Date	Temperature (°C)	Salinity	pH	Dissolved oxygen (mg/L)	Organic matter (%)	Redox (mV)	Silt <63 µm (%)
Rainy season 2021	CGS-1	2021-11-30	30.2	0.8	8.52	6.52	12.6	60	2.8
	CGS-2	2021-11-30	32	2.3	8.87	8.33	16.8	29	26.18
	CGS-3	2021-11-30	31.6	4.3	8.92	8.65	5.6	62	30.88
	CIS-1	2021-11-17	29.9	23.6	7.67	3.58	6.6	55	57.52
	CIS-2	2021-11-17	31.9	26.9	7.86	4.65	5.2	54	77.2
	CIS-3	2021-11-17	31.3	24.2	7.99	4.73	5	47	64.49
Dry season 2022	CGS-1	2022-03-17	29.1	12.1	8.29	5.63	10.7	28	51.8
	CGS-2	2022-03-17	31.7	12.3	8.77	9.02	2.9	39	20.93
	CGS-3	2022-03-17	30.5	31.2	8.27	7.52	4.3	38	60.27
	CIS-1	2022-04-09	29	31.9	8.19	5.33	8.6	55	47.61
	CIS-2	2022-04-09	29	30	8.19	5.57	5.6	77	89.21
	CIS-3	2022-04-09	28.9	30.6	8.2	5.66	4.1	62	63.03
