# Supplementary material for: Changes in mercury content in oysters in relation to sediment and seston content in the Colombian Caribbean lagoons
Source: PeerJ. 2025 Oct 24;13:e19868. doi: 10.7717/peerj.19868 (PMC12558159; doi:10.7717/peerj.19868)
Supplement: Supplemental Information 2 — Raw data in the results of Hg concentrations in µg/g in sediments (dry weight) and seston (dry weight and wet weight) in the Ciénaga Grande de Santa Marta (CGSM), and Cispatá Bay during the rainy season (November 2021) and dry season (March 2022). [file peerj-13-19868-s002.xlsx]

## Sheet: Hoja1
Season	Ecosystem	Station	Sediments	Seston
			(Dry weight)	Dry weight	Wet weight
Rainy	CGSM	CGS-1	0.059	0.012	0.0003
		CGS-2	0.04	0.01	0.0006
		CGS-3	0.036	0.009	0.0006
	BhC	CIS-1	0.128	0.024	0.0003
		CIS-2	0.096	0.032	0.0005
		CIS-3	0.08	0.04	0.0005
Dry	CGSM	CGS-1	0.004	0.003	0.0001
		CGS-2	0.07	0.004	0.0001
		CGS-3	0.037	0.005	0.0002
	BhC	CIS-1	0.121	0.023	0.0005
		CIS-2	0.081	0.022	0.0005
		CIS-3	0.074	0.02	0.0005
