# Supplementary material for: Changes in mercury content in oysters in relation to sediment and seston content in the Colombian Caribbean lagoons
Source: PeerJ. 2025 Oct 24;13:e19868. doi: 10.7717/peerj.19868 (PMC12558159; doi:10.7717/peerj.19868)
Supplement: Supplemental Information 3 — Results of correlations in the Hg content in sediments and seston with respect to the environmental variables measured in the stations of Ciénaga Grande de Santa Marta (CGSM) and Cispatá Bay (BhC) during the rainy season (November 2021) and dry season (March-April 2022). Red font color denotes high and significant correlations. [file peerj-13-19868-s003.xlsx]

## Sheet: Hoja1
Environmental variables	Sediments				Seston
	CGSM		BhC		CGSM		BhC
	Rho	p-value	Rho	p-value	Rho	p-value	Rho	p-value
Temperature (°C)	0.591	0.217	-0,070*	0,895*	0,463*	0,355*	0,933*	0,006*
Salinity	-0.121	0.819	-0,176*	0,738*	-0.619	0.19	-0,631*	0,179*
pH	0.451	0.37	-0,517*	0,293*	0.463	0.355	-0,328*	0,525*
Dissolved oxygen (mg/L)	0.597	0.21	-0,624*	0,185*	0.111	0.834	-0,314*	0,545*
Organic matter (%)	-0.238	0.649	0,845*	0,039*	0.58	0.228	-0,234*	0,656*
The correlations obtained from the parametric Pearson statistic (R) are indicated with *. The remaining results were obtained from the non-parametric Spearman statistic (Rho). The degrees of freedom in all tests were 11 (df = 11).
