# Supplementary material for: Changes in mercury content in oysters in relation to sediment and seston content in the Colombian Caribbean lagoons
Source: PeerJ. 2025 Oct 24;13:e19868. doi: 10.7717/peerj.19868 (PMC12558159; doi:10.7717/peerj.19868)
Supplement: Supplemental Information 4 — Raw data in the results of Hg concentrations in µg/g dry weight (d.w.), wet weight (w.w.), and anteroposterior length (APL) average (avg) and desviation (desv) in the oysters Crassostrea rhizophorae. Ciénaga Grande de Santa Marta (CGSM) and Cispatá Bay (BhC). [file peerj-13-19868-s004.xlsx]

## Sheet: Hoja1
Season	Ecosistem	Station	Age	Sample code	Hg (µg/g dry weight) oysters	Hg (µg/kg wet weight) oysters	Dry weight osyters (g)	Wet weight oysters (g)	APL (mm)		Integrated individuals (n)
									avg	desv
Rainy	CGSM	CGS-1	Adult	I-R-21-CGS-1-101-Adult	0.104	23	2.015	9.282	51.5	1.78	4
			Adult	I-R-21-CGS-1-102-Adult	0.083	24	2.244	7.778	55	1.633	4
			Adult	I-R-21-CGS-1-103-Adult	0.109	12	0.827	7.621	45.75	1.061	2
		CGS-2	Adult	I-R-21-CGS-2-201-Adult	0.132	15	1.249	10.873	56.75	2.475	2
			Adult	I-R-21-CGS-2-202-Adult	0.059	9	1.534	9.746	46	1.414	2
			Adult	I-R-21-CGS-2-203-Adult	0.087	29	2.325	6.929	44.75	1.405	6
		CGS-3	Adult	I-R-21-CGS-3-301-Adult	0.057	8	0.995	7.319	41.375	2.926	4
			Adult	I-R-21-CGS-3-302-Adult	0.043	10	1.107	4.794	36.25	1.323	4
	Cispatá Bay	CIS-1	Adult	I-R-21-CIS-1-101-Adult	0.101	19	0.752	3.96	38.25	0.354	2
			Adult	I-R-21-CIS-1-102-Adult	0.08	25	1.164	3.69	36.125	1.031	4
			Adult	I-R-21-CIS-1-103-Adult	0.184	67	1.224	3.37	39.5	1	4
		CIS-2	Adult	I-R-21-CIS-2-201-Adult	0.074	22	1.455	5.01	41.25	1.893	4
			Adult	I-R-21-CIS-2-202-Adult	0.108	21	1.03	5.35	45	2.828	2
			Adult	I-R-21-CIS-2-203-Adult	0.076	24	1.652	5.18	40.2	2.387	5
		CIS-3	Adult	I-R-21-CIS-3-301-Adult	0.138	40	1.116	3.86	42.2	2.683	5
			Adult	I-R-21-CIS-3-302-Adult	0.116	35	1.156	3.79	38.5	0.577	4
			Adult	I-R-21-CIS-3-303-Adult	0.133	26	0.793	4.11	37	0	2
	CGSM	CGS-1	Juvenile	I-R-21-CGS-1-104-Juvenile	0.122	16	0.812	6.369	30.25	0.866	4
			Juvenile	I-R-21-CGS-1-105-Juvenile	0.091	17	1.215	6.373	29.188	1.602	8
			Juvenile	I-R-21-CGS-1-106-Juvenile	0.112	25	1.167	5.319	30.438	0.776	8
		CGS-2	Juvenile	I-R-21-CGS-2-204-Juvenile	0.063	9	0.716	5.099	30.375	0.946	4
			Juvenile	I-R-21-CGS-2-205-Juvenile	0.053	13	1.108	4.388	29.813	1.534	8
			Juvenile	I-R-21-CGS-2-206-Juvenile	0.05	13	1.246	4.71	26.222	2.167	9
		CGS-3	Juvenile	I-R-21-CGS-3-304-Juvenile	0.054	6	0.719	6.476	25	0.816	4
			Juvenile	I-R-21-CGS-3-305-Juvenile	0.135	40	1.081	3.678	27.813	1.751	8
			Juvenile	I-R-21-CGS-3-306-Juvenile	0.06	12	0.995	5.087	23.875	2.083	8
	Cispatá Bay	CIS-1	Juvenile	I-R-21-CIS-1-104-Juvenile	0.094	16	0.963	5.72	29.5	0.577	4
			Juvenile	I-R-21-CIS-1-105-Juvenile	0.098	31	1.658	5.29	28.75	0.835	8
			Juvenile	I-R-21-CIS-1-106-Juvenile	0.206	67	1.468	4.54	26.75	1.731	8
		CIS-2	Juvenile	I-R-21-CIS-2-204-Juvenile	0.093	41	1.973	4.51	29	0.886	8
			Juvenile	I-R-21-CIS-2-205-Juvenile	0.162	58	1.934	5.42	30	1.413	8
			Juvenile	I-R-21-CIS-2-206-Juvenile	0.09	30	1.71	5.13	28.875	1.75	4
		CIS-3	Juvenile	I-R-21-CIS-3-304-Juvenile	0.122	40	1.167	3.6	28.875	1.604	8
			Juvenile	I-R-21-CIS-3-305-Juvenile	0.268	46	0.724	4.25	28.625	1.031	4
			Juvenile	I-R-21-CIS-3-306-Juvenile	0.284	95	1.279	3.84	25.875	1.335	8
Dry	CGSM	CGS-1	Adult	II-D-22-CGS-1-101-Adult	0.045	3	0.705	10.705	53.5	0.707	2
			Adult	II-D-22-CGS-1-102-Adult	0.048	4	0.867	10.867	46.75	2.363	4
			Adult	II-D-22-CGS-1-103-Adult	0.058	10	1.775	10.763	41.375	0.916	8
		CGS-2	Adult	II-D-22-CGS-2-201-Adult	0.057	28	0.983	1.999	49	2.345	5
			Adult	II-D-22-CGS-2-202-Adult	0.064	15	2.067	9.048	43.889	1.193	9
			Adult	II-D-22-CGS-2-203-Adult	0.056	11	2.007	10.571	39.5	1.65	10
		CGS-3	Adult	II-D-22-CGS-3-301-Adult	0.094	55	1.514	2.586	46	2.646	5
			Adult	II-D-22-CGS-3-302-Adult	0.121	29	0.939	3.926	41.286	0.699	7
			Adult	II-D-22-CGS-3-303-Adult	0.148	38	1.913	7.449	38.563	0.943	8
	Cispatá Bay	CIS-1	Adult	II-D-22-CIS-1-101-Adult	0.088	14	1.79	11.339	53.75	2.217	4
			Adult	II-D-22-CIS-1-102-Adult	0.12	14	1.327	11.242	48.75	0.5	4
			Adult	II-D-22-CIS-1-103-Adult	0.103	12	1.367	11.645	44	2.236	5
		CIS-2	Adult	II-D-22-CIS-2-201-Adult	0.147	16	1.203	11.381	50	2.345	5
			Adult	II-D-22-CIS-2-202-Adult	0.085	7	0.944	11.522	45.5	0.577	4
			Adult	II-D-22-CIS-2-203-Adult	0.099	11	1.285	11.717	39.8	0.837	5
		CIS-3	Adult	II-D-22-CIS-3-301-Adult	0.094	9	1.186	12.614	41.5	0.577	4
			Adult	II-D-22-CIS-3-302-Adult	0.226	33	2.118	14.394	38.5	0.527	10
			Adult	II-D-22-CIS-3-303-Adult	0.126	14	1.256	11.407	35.5	0.548	6
	CGSM	CGS-1	Juvenile	II-D-22-CGS-1-104-Juvenile	0.057	8	1.587	11.645	30.455	0.472	11
			Juvenile	II-D-22-CGS-1-105-Juvenile	0.041	10	1.658	6.794	29.154	2.035	13
			Juvenile	II-D-22-CGS-1-106-Juvenile	0.09	24	1.351	5.003	25.692	1.548	13
		CGS-2	Juvenile	II-D-22-CGS-2-204-Juvenile	0.078	18	2.576	11.189	31.2	1.14	20
			Juvenile	II-D-22-CGS-2-205-Juvenile	0.05	15	1.348	4.543	28.591	1.497	11
			Juvenile	II-D-22-CGS-2-206-Juvenile	0.056	8	0.677	4.473	24	1.886	10
		CGS-3	Juvenile	II-D-22-CGS-3-304-Juvenile	0.029	9	2.763	9.025	24.739	1.322	23
			Juvenile	II-D-22-CGS-3-305-Juvenile	0.057	14	0.867	3.672	28.615	0.961	13
			Juvenile	II-D-22-CGS-3-306-Juvenile	0.031	7	2.219	10.088	31.281	0.752	16
	Cispatá Bay	CIS-1	Juvenile	II-D-22-CIS-1-104-Juvenile	0.094	14	1.987	13.734	31.3	0.949	10
			Juvenile	II-D-22-CIS-1-105-Juvenile	0.099	15	1.888	12.663	28.1	0.876	10
			Juvenile	II-D-22-CIS-1-106-Juvenile	0.077	10	1.742	12.727	25.2	0.941	15
		CIS-2	Juvenile	II-D-22-CIS-2-204-Juvenile	0.243	29	1.535	12.716	31.222	0.833	9
			Juvenile	II-D-22-CIS-2-205-Juvenile	0.269	41	1.814	11.93	27.417	0.515	12
			Juvenile	II-D-22-CIS-2-206-Juvenile	0.306	42	1.775	12.79	24.467	0.915	15
		CIS-3	Juvenile	II-D-22-CIS-3-304-Juvenile	0.329	38	1.258	10.882	30.714	0.488	7
			Juvenile	II-D-22-CIS-3-305-Juvenile	0.16	19	1.347	11.334	27.5	0.527	10
			Juvenile	II-D-22-CIS-3-306-Juvenile	0.103	12	1.219	10.784	24.3	0.823	10
