# Supplementary material for: Changes in mercury content in oysters in relation to sediment and seston content in the Colombian Caribbean lagoons
Source: PeerJ. 2025 Oct 24;13:e19868. doi: 10.7717/peerj.19868 (PMC12558159; doi:10.7717/peerj.19868)
Supplement: Supplemental Information 5 — PERMANOVA comparisons were conducted on mercury concentrations in µg/g dry weight (d.w.) and its bioconcentration factor (BCF) vs. ages (juveniles and adults), stations, ecosystem, and climatic season in the oyster Crassostrea rhizophorae. Ciénaga Grande de Santa Marta (CGSM) and Cispatá Bay (BhC). [file peerj-13-19868-s005.xlsx]

## Sheet: Hoja1
Hg (µg/g d.w.)
Season	Ecosystem	Stations	Pseudo-t	Únique	p-value
Rainy 2021	CGSM-BhC	-	3.67	9822	0.0008
Dry 2022	CGSM-BhC	-	6.06	9815	0.0001
Rainy 2021	CGSM	CGS-1, CGS-2	2.36	8728	0.046
	BhC	CIS-2, CIS-3	2.63	8803	0.027
Dry 2022		CIS-1, CIS-2	6.6	8784	0.0001
Rainy 2021-Dry 2022	CGSM	CGS-1	4.83	8694	0.0011
	BhC	CIS-2	4.93	8864	0.0013
Season	Ecosystem	Stations	Age	Pseudo-t	Únique	p (MC)
Dry 2022	CGSM	CGS-3	Juvenile-Adult	4.53	10	0.0095
	BhC	CIS-2	Juvenile-Adult	6.2	10	0.003
Rainy 2021	CGSM	CGS-1	Adult	5.41	10	0.0058
Dry 2022		CGS-3	Adult	3.41	10	0.042
	BhC	CIS-2	Juvenile	5.29	10	0.0058
