# Supplementary material for: Changes in mercury content in oysters in relation to sediment and seston content in the Colombian Caribbean lagoons
Source: PeerJ. 2025 Oct 24;13:e19868. doi: 10.7717/peerj.19868 (PMC12558159; doi:10.7717/peerj.19868)
Supplement: Supplemental Information 6 — Record of the concentration and contamination level by the Nemerow Comprehensive Pollution Index (Pc) of Hg in marine-coastal ecosystems in Crassostrea rhizophorae and among all bivalve species in the time season from 1970 to 2022. Pollution level: 2.0 < Pc ≤ 3.0 high ∘, and Pc > 3.0 very high ∘. Avg: average, EE: standard error, min: minimum y max: maximum. [file peerj-13-19868-s006.xlsx]

## Sheet: Supplementary Table 6
Study Specie	Continent	Country	Location (Time), Country	Year	Avg ± EE min-max (n data) (µg/kg wet weight)	Hg (Pc)
Crassostrea rhizophorae	America	Colombia	Ciénaga Grande de Santa Marta (2021, 2022), COL	2021	16,5 ± 2,2 6-39,7 (17)	4.77493
				2022	16,9 ± 3,2 3-55,1 (18)
			Cispatá Bay (2021, 2022), COL	2021	38,9 ± 4,9 15,8-94,5 (18)	5.92245
				2022	19,4 ± 2,8 7-42,5 (18)
Bivalves	Africa	South Africa	Saldana Bay (2016), ZAF	2016	4,3 ± 1,2 2-10 (6)	2.33333
	America	Brazil	Sepetiba Bay (2001), BRA	2001	57,5 ± 10,9 6-120 (12)	7.82091
		United States	South Carolina (1986-1993), USA	1986 - 1993	42,1 ± 18,1 19,5-205 (10)	9.42727
	Asia	China	DaLian (2003), CHN	2003	14,3 ± 1,1 6,4-17,1 (9)	3.54756
			HuLuDao (2003), CHN	2003	26 ± 4,7 15,8-38,4 (4)	5.16882
			PengLai (2003), CHN	2003	27,2 ± 3,9 15,6-47,5 (9)	5.48533
			QinHuangDao (2003), CHN	2003	12 ± 0,9 7,5-14,8 (9)	3.38077
			TangGu (2003), CHN	2003	10,7 ± 1,8 4,8-21,8 (8)	3.52491
			WeiHai (2003), CHN	2003	10 ± 1 7,3-13,9 (8)	3.22619
			YangKou (2003), CHN	2003	14,9 ± 2,9 8,4-27,7 (6)	4.12243
			YingKou (2003), CHN	2003	17,5 ± 2,1 8,6-23,6 (6)	4.07022
			Yellow Sea and Bohai Sea (2019), CHN	2019	29,1 ± 5,4 10-70 (15)	6.02956
		Indonesia	East Java Coast (2019), IDN	2019	272,5 ± 172,1 20-1470 (8)	24.2384
		South Korea	Changseon coast (2008), KOR	2008	7 ± 1,3 3-15 (9)	2.88675
		Taiwan	Yunling (1973), TWN	1973	31,3 ± 8,8 5-40 (4)	5.04149
			Chiayi (1973), TWN	1973	21,3 ± 8,3 5-40 (4)	4.69929
		Vietnam	Quang Ninh Province (2021), VNM	2021	130 ± 26,7 50-220 (6)	11.547
	Europe	Belgium	Cape Skagen (1975), BEL	1975	182,7 ± 20,5 130-360 (15)	14.9741
		Croatia	Daksa (1984), HRV	1984	22**	4.69042
			Dubrovnik aquarium (1984), HRV	1984	26**	5.09902
			Kastela Bay (1980-1985), HRV	1980	7188,9 ± 3306 200-26900 (9)	76.6311
				1981	12528,6 ± 3134,6 100-25600 (7)
				1985	102**
			Kornati Islands (1983), HRV	1983	28**	5.2915
			Maloston Bay (1984), HRV	1984	19**	4.3589
			Razine (1983), HRV	1983	13**	3.60555
			Sibenik aquarium (1983), HRV	1983	34*	5.83095
			Adriatic coast (2011, 2012), HRV	2011	220,6 ± 45,8 5-680 (19)	14.0808
				2012	78,1 ± 17,2 26-245 (19)
		Denmark	North Sea (1975), DNK	1975	141,4 ± 33,7 60-800 (21)	14.3178
		Denmark	"Cheminova" factory (1982-1983), DNK	1982 - 1983	928,3 ± 119,6 116,9-1516 (18)	29.2186
		France	English Channel (1975), FRA	1975	93,5 ± 6,8 20-180 (37)	9.8913
			Atlantic Ocean (1975), FRA	1975	156,9 ± 11,8 90-330 (26)	13.8675
		Italy	Adriatic Sea (1975), ITA	1977	27,5 ± 2,5 25-30 (2)	5.24404
			Genoa coast (1977-1979), ITA	1977	26,7 ± 7,5 14-40 (3)	5.25286
				1978	20 ± 2,9 15-25 (3)
				1979	36,7 ± 7,3 25-50 (3)
			Venice Lagoon (1970), ITA	1970	525 ± 25 500-550 (2)	22.9129
			Bari (1987), ITA	1987	15,5 ± 0,5 15-16 (2)	3.937
			Brindisi (1987), ITA	1987	52**	7.2111
			Genoa coast (1980, 1987), ITA	1980	35 ± 16,1 10-65 (3)	6.94077
				1987	58,8 ± 18,3 18-107 (4)
			Flumicino (1987), ITA	1987	29,9 ± 2,9 20-44 (9)	5.59431
			Giaia Tauro (1987), ITA	1987	14,5 ± 1,5 13-16 (2)	3.80789
			Ishia (1987), ITA	1987	10**	3.16228
			La Spezia (1987), ITA	1987	36,3 ± 4,4 30-49 (4)	6.19812
			Manfredonia (1987), ITA	1987	18,3 ± 1,2 16-20 (3)	4.25572
			Montecristo (1987), ITA	1987	32**	5.65685
			Olbia (1987), ITA	1987	12**	3.4641
			Piombino (1987), ITA	1987	33**	5.74456
			Porto S. Stefano (1987), ITA	1987	69 ± 30 39-99 (2)	8.30662
			Salerno (1987), ITA	1987	23,5 ± 4,5 19-28 (2)	4.84768
			Taranto (1987), ITA	1987	42,5 ± 0,5 42-43 (2)	6.5192
			Termoli (1987), ITA	1987	18 ± 1,2 16-20 (3)	4.24264
			Terracina (1987), ITA	1987	18,7 ± 2,2 16-23 (3)	4.38432
			Calic Lagoon (2017), ITA	2017	15 ± 1,5 11-21 (9)	3.95811
			Marano Lagoon (2008), ITA	2008	307,5 ± 45,5 54-985 (27)	21.1858
			Sardegna (2012), ITA	2012	10,7 ± 3,3 6-17 (3)	3.34996
			Tevere (2007, 2009), ITA	2007	8 ± 3 5-11 (2)	8.88
				2009	74,2 ± 18,1 5-590 (42)
			Mediterranean Sea (2010), ITA	2010	14 ± 12,5 0-39 (3)	4.20317
		Montenegro	Bar (2009), MNE	2009	100 ± 37,9 40-170 (3)	10.1653
			Boka Kotorska Bay (2009), MNE	2009	96,7 ± 43,3 20-170 (3)	9.77525
			Krasci (2009), MNE	2009	80 ± 23,1 40-120 (3)	8.94427
			Kukulijina (2009), MNE	2009	73,3 ± 29,6 30-130 (3)	8.81917
			Rt. Djeran (2009), MNE	2009	16,7 ± 3,3 10-20 (3)	3.94405
			Steva Stasija (2009), MNE	2009	70 ± 41,6 10-150 (3)	8.75595
		Netherlands	North Sea (1975), NLD	1975	155 ± 24,5 30-430 (14)	14.3178
		Norway	Bergen Harbour (1996), NOR	1996	29 ± 2,6 10-57 (20)	5.65685
		Portugal	Guadiana River Estuary (2013), PRT	2013	24 ± 1,6 20-30 (10)	4.96655
			Lima River Estuary (2013), PRT	2013	18 ± 3,7 10-30 (5)	4.39697
			Mondego River Estuary (2013), PRT	2013	14 ± 1,6 10-20 (10)	3.82971
			Ria de Aveiro Lagoon (2013), PRT	2013	395 ± 87 10-1300 (20)	23.8397
			Ria Formosa Lagoon (2013), PRT	2013	16 ± 1,6 10-20 (10)	3.91578
			Sado River Estuary (2013), PRT	2013	22 ± 2 10-30 (10)	4.54606
			Tagus River Estuary (2013), PRT	2013	34 ± 4 20-60 (10)	6.16441
		Spain	Algeciras Bay (1996, 1997), SPA	1997	23 ± 8 15-31 (2)	4.33441
				1996	15**
			Barbate river (1996), SPA	1996	11**	3.31662
			Cádiz Bay (1996, 1987), SPA	1997	114,9 ± 33,6 11-389 (12)	10.5506
				1996	64 ± 7 57-71 (2)
			Carreras (1996), SPA	1996	47**	6.85565
			Guadiana (1996), SPA	1996	61**	7.81025
			Piedras rivers (1996), SPA	1996	69**	8.30662
			Galicia (2006, 2010), SPA	2006	33,7 ± 6,2 8,6-48,33 (6)	2.74793
				2010	0 ± 0 0-0 (3)
		United Kingdom	English Channel (1975), GBR	1975	265,7 ± 28,2 50-800 (35)	19.2848
