# Supplementary material for: Changes in mercury content in oysters in relation to sediment and seston content in the Colombian Caribbean lagoons
Source: PeerJ. 2025 Oct 24;13:e19868. doi: 10.7717/peerj.19868 (PMC12558159; doi:10.7717/peerj.19868)
Supplement: Supplemental Information 7 — Raw data in the record of the Hg concentration in marine-coastal ecosystems in Crassostrea rhizophorae and among all bivalve species in the time season from 1970 to 2022, for evaluated the pollution index (Pc). [file peerj-13-19868-s007.xlsx]

## Sheet: Supplementary Table 7
Author	Time	Year	Country	Location	Species	Hg (µg/kg)
Jeng and Huang (1973)	1956 - 1979	1973	Taiwan	Yunling	Magallana gigas	40
Jeng and Huang (1973)	1956 - 1979	1973	Taiwan	Yunling	Magallana gigas	40
Jeng and Huang (1973)	1956 - 1979	1973	Taiwan	Yunling	Magallana gigas	40
Jeng and Huang (1973)	1956 - 1979	1973	Taiwan	Yunling	Magallana gigas	5
Jeng and Huang (1973)	1956 - 1979	1973	Taiwan	Chiayi	Magallana gigas	40
Jeng and Huang (1973)	1956 - 1979	1973	Taiwan	Chiayi	Magallana gigas	30
Jeng and Huang (1973)	1956 - 1979	1973	Taiwan	Chiayi	Magallana gigas	5
Jeng and Huang (1973)	1956 - 1979	1973	Taiwan	Chiayi	Magallana gigas	10
De Wolf (1975)	1956 - 1979	1975	United Kingdom	English Channel	Mytilus edulis	160
De Wolf (1975)	1956 - 1979	1975	United Kingdom	English Channel	Mytilus edulis	350
De Wolf (1975)	1956 - 1979	1975	United Kingdom	English Channel	Mytilus edulis	130
De Wolf (1975)	1956 - 1979	1975	United Kingdom	English Channel	Mytilus edulis	370
De Wolf (1975)	1956 - 1979	1975	United Kingdom	English Channel	Mytilus edulis	170
De Wolf (1975)	1956 - 1979	1975	United Kingdom	English Channel	Mytilus edulis	340
De Wolf (1975)	1956 - 1979	1975	United Kingdom	English Channel	Mytilus edulis	630
De Wolf (1975)	1956 - 1979	1975	United Kingdom	English Channel	Mytilus edulis	310
De Wolf (1975)	1956 - 1979	1975	United Kingdom	English Channel	Mytilus edulis	110
De Wolf (1975)	1956 - 1979	1975	United Kingdom	English Channel	Mytilus edulis	240
De Wolf (1975)	1956 - 1979	1975	United Kingdom	English Channel	Mytilus edulis	340
De Wolf (1975)	1956 - 1979	1975	United Kingdom	English Channel	Mytilus edulis	480
De Wolf (1975)	1956 - 1979	1975	United Kingdom	English Channel	Mytilus edulis	800
De Wolf (1975)	1956 - 1979	1975	United Kingdom	English Channel	Mytilus edulis	270
De Wolf (1975)	1956 - 1979	1975	United Kingdom	English Channel	Mytilus edulis	220
De Wolf (1975)	1956 - 1979	1975	United Kingdom	English Channel	Mytilus edulis	330
De Wolf (1975)	1956 - 1979	1975	United Kingdom	English Channel	Mytilus edulis	110
De Wolf (1975)	1956 - 1979	1975	United Kingdom	English Channel	Mytilus edulis	380
De Wolf (1975)	1956 - 1979	1975	United Kingdom	English Channel	Mytilus edulis	170
De Wolf (1975)	1956 - 1979	1975	United Kingdom	English Channel	Mytilus edulis	170
De Wolf (1975)	1956 - 1979	1975	United Kingdom	English Channel	Mytilus edulis	140
De Wolf (1975)	1956 - 1979	1975	United Kingdom	English Channel	Mytilus edulis	120
De Wolf (1975)	1956 - 1979	1975	United Kingdom	English Channel	Mytilus edulis	50
De Wolf (1975)	1956 - 1979	1975	United Kingdom	English Channel	Mytilus edulis	150
De Wolf (1975)	1956 - 1979	1975	United Kingdom	English Channel	Mytilus edulis	280
De Wolf (1975)	1956 - 1979	1975	United Kingdom	English Channel	Mytilus edulis	230
De Wolf (1975)	1956 - 1979	1975	United Kingdom	English Channel	Mytilus edulis	280
De Wolf (1975)	1956 - 1979	1975	United Kingdom	English Channel	Mytilus edulis	170
De Wolf (1975)	1956 - 1979	1975	United Kingdom	English Channel	Mytilus edulis	250
De Wolf (1975)	1956 - 1979	1975	United Kingdom	English Channel	Mytilus edulis	210
De Wolf (1975)	1956 - 1979	1975	United Kingdom	English Channel	Mytilus edulis	660
De Wolf (1975)	1956 - 1979	1975	United Kingdom	English Channel	Mytilus edulis	70
De Wolf (1975)	1956 - 1979	1975	United Kingdom	English Channel	Mytilus edulis	140
De Wolf (1975)	1956 - 1979	1975	United Kingdom	English Channel	Mytilus edulis	270
De Wolf (1975)	1956 - 1979	1975	United Kingdom	English Channel	Mytilus edulis	200
De Wolf (1975)	1956 - 1979	1975	France	Atlantic Ocean	Mytilus edulis	100
De Wolf (1975)	1956 - 1979	1975	France	Atlantic Ocean	Mytilus edulis	120
De Wolf (1975)	1956 - 1979	1975	France	Atlantic Ocean	Mytilus edulis	160
De Wolf (1975)	1956 - 1979	1975	France	Atlantic Ocean	Mytilus edulis	150
De Wolf (1975)	1956 - 1979	1975	France	Atlantic Ocean	Mytilus edulis	280
De Wolf (1975)	1956 - 1979	1975	France	Atlantic Ocean	Mytilus edulis	100
De Wolf (1975)	1956 - 1979	1975	France	Atlantic Ocean	Mytilus edulis	180
De Wolf (1975)	1956 - 1979	1975	France	Atlantic Ocean	Mytilus edulis	330
De Wolf (1975)	1956 - 1979	1975	France	Atlantic Ocean	Mytilus edulis	290
De Wolf (1975)	1956 - 1979	1975	France	Atlantic Ocean	Mytilus edulis	150
De Wolf (1975)	1956 - 1979	1975	France	Atlantic Ocean	Mytilus edulis	170
De Wolf (1975)	1956 - 1979	1975	France	Atlantic Ocean	Mytilus edulis	170
De Wolf (1975)	1956 - 1979	1975	France	Atlantic Ocean	Mytilus edulis	110
De Wolf (1975)	1956 - 1979	1975	France	Atlantic Ocean	Mytilus edulis	110
De Wolf (1975)	1956 - 1979	1975	France	Atlantic Ocean	Mytilus edulis	130
De Wolf (1975)	1956 - 1979	1975	France	Atlantic Ocean	Mytilus edulis	110
De Wolf (1975)	1956 - 1979	1975	France	Atlantic Ocean	Mytilus edulis	150
De Wolf (1975)	1956 - 1979	1975	France	Atlantic Ocean	Mytilus edulis	130
De Wolf (1975)	1956 - 1979	1975	France	Atlantic Ocean	Mytilus edulis	170
De Wolf (1975)	1956 - 1979	1975	France	Atlantic Ocean	Mytilus edulis	130
De Wolf (1975)	1956 - 1979	1975	France	Atlantic Ocean	Mytilus edulis	180
De Wolf (1975)	1956 - 1979	1975	France	Atlantic Ocean	Mytilus edulis	180
De Wolf (1975)	1956 - 1979	1975	France	Atlantic Ocean	Mytilus edulis	120
De Wolf (1975)	1956 - 1979	1975	France	Atlantic Ocean	Mytilus edulis	100
De Wolf (1975)	1956 - 1979	1975	France	Atlantic Ocean	Mytilus edulis	90
De Wolf (1975)	1956 - 1979	1975	France	Atlantic Ocean	Mytilus edulis	170
De Wolf (1975)	1956 - 1979	1975	France	English Channel	Mytilus edulis	70
De Wolf (1975)	1956 - 1979	1975	France	English Channel	Mytilus edulis	70
De Wolf (1975)	1956 - 1979	1975	France	English Channel	Mytilus edulis	180
De Wolf (1975)	1956 - 1979	1975	France	English Channel	Mytilus edulis	60
De Wolf (1975)	1956 - 1979	1975	France	English Channel	Mytilus edulis	50
De Wolf (1975)	1956 - 1979	1975	France	English Channel	Mytilus edulis	80
De Wolf (1975)	1956 - 1979	1975	France	English Channel	Mytilus edulis	100
De Wolf (1975)	1956 - 1979	1975	France	English Channel	Mytilus edulis	100
De Wolf (1975)	1956 - 1979	1975	France	English Channel	Mytilus edulis	70
De Wolf (1975)	1956 - 1979	1975	France	English Channel	Mytilus edulis	50
De Wolf (1975)	1956 - 1979	1975	France	English Channel	Mytilus edulis	70
De Wolf (1975)	1956 - 1979	1975	France	English Channel	Mytilus edulis	100
De Wolf (1975)	1956 - 1979	1975	France	English Channel	Mytilus edulis	80
De Wolf (1975)	1956 - 1979	1975	France	English Channel	Mytilus edulis	120
De Wolf (1975)	1956 - 1979	1975	France	English Channel	Mytilus edulis	30
De Wolf (1975)	1956 - 1979	1975	France	English Channel	Mytilus edulis	80
De Wolf (1975)	1956 - 1979	1975	France	English Channel	Mytilus edulis	120
De Wolf (1975)	1956 - 1979	1975	France	English Channel	Mytilus edulis	100
De Wolf (1975)	1956 - 1979	1975	France	English Channel	Mytilus edulis	130
De Wolf (1975)	1956 - 1979	1975	France	English Channel	Mytilus edulis	100
De Wolf (1975)	1956 - 1979	1975	France	English Channel	Mytilus edulis	20
De Wolf (1975)	1956 - 1979	1975	France	English Channel	Mytilus edulis	110
De Wolf (1975)	1956 - 1979	1975	France	English Channel	Mytilus edulis	100
De Wolf (1975)	1956 - 1979	1975	France	English Channel	Mytilus edulis	30
De Wolf (1975)	1956 - 1979	1975	France	English Channel	Mytilus edulis	120
De Wolf (1975)	1956 - 1979	1975	France	English Channel	Mytilus edulis	150
De Wolf (1975)	1956 - 1979	1975	France	English Channel	Mytilus edulis	110
De Wolf (1975)	1956 - 1979	1975	France	English Channel	Mytilus edulis	130
De Wolf (1975)	1956 - 1979	1975	France	English Channel	Mytilus edulis	140
De Wolf (1975)	1956 - 1979	1975	France	English Channel	Mytilus edulis	30
De Wolf (1975)	1956 - 1979	1975	France	English Channel	Mytilus edulis	50
De Wolf (1975)	1956 - 1979	1975	France	English Channel	Mytilus edulis	140
De Wolf (1975)	1956 - 1979	1975	France	English Channel	Mytilus edulis	140
De Wolf (1975)	1956 - 1979	1975	France	English Channel	Mytilus edulis	30
De Wolf (1975)	1956 - 1979	1975	France	English Channel	Mytilus edulis	180
De Wolf (1975)	1956 - 1979	1975	France	English Channel	Mytilus edulis	100
De Wolf (1975)	1956 - 1979	1975	France	English Channel	Mytilus edulis	120
De Wolf (1975)	1956 - 1979	1975	Belgium	Cape Skagen	Mytilus edulis	130
De Wolf (1975)	1956 - 1979	1975	Belgium	Cape Skagen	Mytilus edulis	130
De Wolf (1975)	1956 - 1979	1975	Belgium	Cape Skagen	Mytilus edulis	130
De Wolf (1975)	1956 - 1979	1975	Belgium	Cape Skagen	Mytilus edulis	130
De Wolf (1975)	1956 - 1979	1975	Belgium	Cape Skagen	Mytilus edulis	160
De Wolf (1975)	1956 - 1979	1975	Belgium	Cape Skagen	Mytilus edulis	130
De Wolf (1975)	1956 - 1979	1975	Belgium	Cape Skagen	Mytilus edulis	130
De Wolf (1975)	1956 - 1979	1975	Belgium	Cape Skagen	Mytilus edulis	150
De Wolf (1975)	1956 - 1979	1975	Belgium	Cape Skagen	Mytilus edulis	130
De Wolf (1975)	1956 - 1979	1975	Belgium	Cape Skagen	Mytilus edulis	360
De Wolf (1975)	1956 - 1979	1975	Belgium	Cape Skagen	Mytilus edulis	180
De Wolf (1975)	1956 - 1979	1975	Belgium	Cape Skagen	Mytilus edulis	240
De Wolf (1975)	1956 - 1979	1975	Belgium	Cape Skagen	Mytilus edulis	310
De Wolf (1975)	1956 - 1979	1975	Belgium	Cape Skagen	Mytilus edulis	300
De Wolf (1975)	1956 - 1979	1975	Belgium	Cape Skagen	Mytilus edulis	130
De Wolf (1975)	1956 - 1979	1975	Netherlands	North Sea	Mytilus edulis	430
De Wolf (1975)	1956 - 1979	1975	Netherlands	North Sea	Mytilus edulis	170
De Wolf (1975)	1956 - 1979	1975	Netherlands	North Sea	Mytilus edulis	180
De Wolf (1975)	1956 - 1979	1975	Netherlands	North Sea	Mytilus edulis	120
De Wolf (1975)	1956 - 1979	1975	Netherlands	North Sea	Mytilus edulis	210
De Wolf (1975)	1956 - 1979	1975	Netherlands	North Sea	Mytilus edulis	30
De Wolf (1975)	1956 - 1979	1975	Netherlands	North Sea	Mytilus edulis	130
De Wolf (1975)	1956 - 1979	1975	Netherlands	North Sea	Mytilus edulis	130
De Wolf (1975)	1956 - 1979	1975	Netherlands	North Sea	Mytilus edulis	130
De Wolf (1975)	1956 - 1979	1975	Netherlands	North Sea	Mytilus edulis	200
De Wolf (1975)	1956 - 1979	1975	Netherlands	North Sea	Mytilus edulis	90
De Wolf (1975)	1956 - 1979	1975	Netherlands	North Sea	Mytilus edulis	100
De Wolf (1975)	1956 - 1979	1975	Netherlands	North Sea	Mytilus edulis	120
De Wolf (1975)	1956 - 1979	1975	Netherlands	North Sea	Mytilus edulis	130
De Wolf (1975)	1956 - 1979	1975	Denmark	North Sea	Mytilus edulis	130
De Wolf (1975)	1956 - 1979	1975	Denmark	North Sea	Mytilus edulis	80
De Wolf (1975)	1956 - 1979	1975	Denmark	North Sea	Mytilus edulis	100
De Wolf (1975)	1956 - 1979	1975	Denmark	North Sea	Mytilus edulis	110
De Wolf (1975)	1956 - 1979	1975	Denmark	North Sea	Mytilus edulis	70
De Wolf (1975)	1956 - 1979	1975	Denmark	North Sea	Mytilus edulis	130
De Wolf (1975)	1956 - 1979	1975	Denmark	North Sea	Mytilus edulis	120
De Wolf (1975)	1956 - 1979	1975	Denmark	North Sea	Mytilus edulis	60
De Wolf (1975)	1956 - 1979	1975	Denmark	North Sea	Mytilus edulis	100
De Wolf (1975)	1956 - 1979	1975	Denmark	North Sea	Mytilus edulis	80
De Wolf (1975)	1956 - 1979	1975	Denmark	North Sea	Mytilus edulis	80
De Wolf (1975)	1956 - 1979	1975	Denmark	North Sea	Mytilus edulis	100
De Wolf (1975)	1956 - 1979	1975	Denmark	North Sea	Mytilus edulis	180
De Wolf (1975)	1956 - 1979	1975	Denmark	North Sea	Mytilus edulis	100
De Wolf (1975)	1956 - 1979	1975	Denmark	North Sea	Mytilus edulis	180
De Wolf (1975)	1956 - 1979	1975	Denmark	North Sea	Mytilus edulis	80
De Wolf (1975)	1956 - 1979	1975	Denmark	North Sea	Mytilus edulis	100
De Wolf (1975)	1956 - 1979	1975	Denmark	North Sea	Mytilus edulis	100
De Wolf (1975)	1956 - 1979	1975	Denmark	North Sea	Mytilus edulis	140
De Wolf (1975)	1956 - 1979	1975	Denmark	North Sea	Mytilus edulis	800
De Wolf (1975)	1956 - 1979	1975	Denmark	North Sea	Mytilus edulis	130
Capelli et al. (1983)	1956 - 1979	1977	Italy	coast of Genoa	Mytilus galloprovincialis	14
Capelli et al. (1983)	1956 - 1979	1977	Italy	coast of Genoa	Mytilus galloprovincialis	26
Capelli et al. (1983)	1956 - 1979	1977	Italy	coast of Genoa	Mytilus galloprovincialis	40
Capelli et al. (1983)	1956 - 1979	1978	Italy	coast of Genoa	Mytilus galloprovincialis	15
Capelli et al. (1983)	1956 - 1979	1978	Italy	coast of Genoa	Mytilus galloprovincialis	20
Capelli et al. (1983)	1956 - 1979	1978	Italy	coast of Genoa	Mytilus galloprovincialis	25
Capelli et al. (1983)	1956 - 1979	1979	Italy	coast of Genoa	Mytilus galloprovincialis	25
Capelli et al. (1983)	1956 - 1979	1979	Italy	coast of Genoa	Mytilus galloprovincialis	35
Capelli et al. (1983)	1956 - 1979	1979	Italy	coast of Genoa	Mytilus galloprovincialis	50
Cherry and Shannon (1974)	1956 - 1979	1970	Italy	Venice Lagoon	Mytilus galloprovincialis	500
Cherry and Shannon (1974)	1956 - 1979	1970	Italy	Venice Lagoon	Mytilus galloprovincialis	550
Cherry and Shannon (1974)	1956 - 1979	1977	Italy	Adriatic Sea	Mytilus galloprovincialis	25
Cherry and Shannon (1974)	1956 - 1979	1977	Italy	Adriatic Sea	Mytilus galloprovincialis	30
Usero et al. (1997)	1980 - 1999	1997	Spain	Cadiz Bay	Ruditapes decussatus	61
Usero et al. (1997)	1980 - 1999	1997	Spain	Cadiz Bay	Ruditapes decussatus	47
Usero et al. (1997)	1980 - 1999	1997	Spain	Cadiz Bay	Ruditapes decussatus	69
Usero et al. (1997)	1980 - 1999	1997	Spain	Cadiz Bay	Ruditapes decussatus	57
Usero et al. (1997)	1980 - 1999	1997	Spain	Cadiz Bay	Ruditapes decussatus	71
Usero et al. (1997)	1980 - 1999	1997	Spain	Cadiz Bay	Ruditapes decussatus	11
Usero et al. (1997)	1980 - 1999	1997	Spain	Algeciras Bay	Ruditapes decussatus	15
Usero et al. (1997)	1980 - 1999	1997	Spain	Cadiz Bay	Ruditapes philippinarum	389
Usero et al. (1997)	1980 - 1999	1997	Spain	Cadiz Bay	Ruditapes philippinarum	255
Usero et al. (1997)	1980 - 1999	1997	Spain	Cadiz Bay	Ruditapes philippinarum	243
Usero et al. (1997)	1980 - 1999	1997	Spain	Cadiz Bay	Ruditapes philippinarum	72
Usero et al. (1997)	1980 - 1999	1997	Spain	Cadiz Bay	Ruditapes philippinarum	86
Usero et al. (1997)	1980 - 1999	1997	Spain	Cadiz Bay	Ruditapes philippinarum	18
Usero et al. (1997)	1980 - 1999	1997	Spain	Algeciras Bay	Ruditapes philippinarum	31
Andersen et al. (1996)	1980 - 1999	1996	Norway	Bergen Harbor	Mytilus edulis	36
Andersen et al. (1996)	1980 - 1999	1996	Norway	Bergen Harbor	Mytilus edulis	34
Andersen et al. (1996)	1980 - 1999	1996	Norway	Bergen Harbor	Mytilus edulis	40
Andersen et al. (1996)	1980 - 1999	1996	Norway	Bergen Harbor	Mytilus edulis	57
Andersen et al. (1996)	1980 - 1999	1996	Norway	Bergen Harbor	Mytilus edulis	45
Andersen et al. (1996)	1980 - 1999	1996	Norway	Bergen Harbor	Mytilus edulis	34
Andersen et al. (1996)	1980 - 1999	1996	Norway	Bergen Harbor	Mytilus edulis	34
Andersen et al. (1996)	1980 - 1999	1996	Norway	Bergen Harbor	Mytilus edulis	25
Andersen et al. (1996)	1980 - 1999	1996	Norway	Bergen Harbor	Mytilus edulis	40
Andersen et al. (1996)	1980 - 1999	1996	Norway	Bergen Harbor	Mytilus edulis	29
Andersen et al. (1996)	1980 - 1999	1996	Norway	Bergen Harbor	Mytilus edulis	15
Andersen et al. (1996)	1980 - 1999	1996	Norway	Bergen Harbor	Mytilus edulis	17
Andersen et al. (1996)	1980 - 1999	1996	Norway	Bergen Harbor	Mytilus edulis	23
Andersen et al. (1996)	1980 - 1999	1996	Norway	Bergen Harbor	Mytilus edulis	31
Andersen et al. (1996)	1980 - 1999	1996	Norway	Bergen Harbor	Mytilus edulis	30
Andersen et al. (1996)	1980 - 1999	1996	Norway	Bergen Harbor	Mytilus edulis	29
Andersen et al. (1996)	1980 - 1999	1996	Norway	Bergen Harbor	Mytilus edulis	18
Andersen et al. (1996)	1980 - 1999	1996	Norway	Bergen Harbor	Mytilus edulis	10
Andersen et al. (1996)	1980 - 1999	1996	Norway	Bergen Harbor	Mytilus edulis	15
Andersen et al. (1996)	1980 - 1999	1996	Norway	Bergen Harbor	Mytilus edulis	18
Martincic et al. (1987)	1980 - 1999	1983	Croatia	Sibenik aquarium	Mytilus galloprovincialis	34
Martincic et al. (1987)	1980 - 1999	1983	Croatia	Kornati Islands	Mytilus galloprovincialis	28
Martincic et al. (1987)	1980 - 1999	1984	Croatia	Dubrovnik aquarium	Mytilus galloprovincialis	26
Martincic et al. (1987)	1980 - 1999	1984	Croatia	Maloston Bay, Dubrovnik	Mytilus galloprovincialis	19
Martincic et al. (1987)	1980 - 1999	1983	Croatia	Razine	Mytilus galloprovincialis	13
Martincic et al. (1987)	1980 - 1999	1984	Croatia	Daksa	Mytilus galloprovincialis	22
Martincic et al. (1987)	1980 - 1999	1985	Croatia	Kastela Bay	Mytilus galloprovincialis	102
Giordano et al. (1989)	1980 - 1999	1987	Italy	coast of Genoa	Mytilus galloprovincialis	18
Giordano et al. (1989)	1980 - 1999	1987	Italy	coast of Genoa	Mytilus galloprovincialis	54
Giordano et al. (1989)	1980 - 1999	1987	Italy	coast of Genoa	Mytilus galloprovincialis	107
Giordano et al. (1989)	1980 - 1999	1987	Italy	coast of Genoa	Mytilus galloprovincialis	56
Giordano et al. (1989)	1980 - 1999	1987	Italy	La Spezia	Mytilus galloprovincialis	30
Giordano et al. (1989)	1980 - 1999	1987	Italy	La Spezia	Mytilus galloprovincialis	49
Giordano et al. (1989)	1980 - 1999	1987	Italy	La Spezia	Mytilus galloprovincialis	31
Giordano et al. (1989)	1980 - 1999	1987	Italy	La Spezia	Mytilus galloprovincialis	35
Giordano et al. (1989)	1980 - 1999	1987	Italy	Piombino	Mytilus galloprovincialis	33
Giordano et al. (1989)	1980 - 1999	1987	Italy	Porto S. Stefano	Mytilus galloprovincialis	39
Giordano et al. (1989)	1980 - 1999	1987	Italy	Porto S. Stefano	Mytilus galloprovincialis	99
Giordano et al. (1989)	1980 - 1999	1987	Italy	Montecristo	Mytilus galloprovincialis	32
Giordano et al. (1989)	1980 - 1999	1987	Italy	Olbia	Mytilus galloprovincialis	12
Giordano et al. (1989)	1980 - 1999	1987	Italy	Flumicino	Mytilus galloprovincialis	22
Giordano et al. (1989)	1980 - 1999	1987	Italy	Flumicino	Mytilus galloprovincialis	35
Giordano et al. (1989)	1980 - 1999	1987	Italy	Flumicino	Mytilus galloprovincialis	27
Giordano et al. (1989)	1980 - 1999	1987	Italy	Flumicino	Mytilus galloprovincialis	24
Giordano et al. (1989)	1980 - 1999	1987	Italy	Terracina	Mytilus galloprovincialis	17
Giordano et al. (1989)	1980 - 1999	1987	Italy	Terracina	Mytilus galloprovincialis	16
Giordano et al. (1989)	1980 - 1999	1987	Italy	Terracina	Mytilus galloprovincialis	23
Giordano et al. (1989)	1980 - 1999	1987	Italy	Ischia	Mytilus galloprovincialis	10
Giordano et al. (1989)	1980 - 1999	1987	Italy	Flumicino	Mytilus galloprovincialis	20
Giordano et al. (1989)	1980 - 1999	1987	Italy	Flumicino	Mytilus galloprovincialis	40
Giordano et al. (1989)	1980 - 1999	1987	Italy	Flumicino	Mytilus galloprovincialis	44
Giordano et al. (1989)	1980 - 1999	1987	Italy	Flumicino	Mytilus galloprovincialis	35
Giordano et al. (1989)	1980 - 1999	1987	Italy	Flumicino	Mytilus galloprovincialis	22
Giordano et al. (1989)	1980 - 1999	1987	Italy	Salerno	Mytilus galloprovincialis	19
Giordano et al. (1989)	1980 - 1999	1987	Italy	Salerno	Mytilus galloprovincialis	28
Giordano et al. (1989)	1980 - 1999	1987	Italy	Giaia Tauro	Mytilus galloprovincialis	16
Giordano et al. (1989)	1980 - 1999	1987	Italy	Giaia Tauro	Mytilus galloprovincialis	13
Giordano et al. (1989)	1980 - 1999	1987	Italy	Taranto	Mytilus galloprovincialis	42
Giordano et al. (1989)	1980 - 1999	1987	Italy	Taranto	Mytilus galloprovincialis	43
Giordano et al. (1989)	1980 - 1999	1987	Italy	Brindisi	Mytilus galloprovincialis	52
Giordano et al. (1989)	1980 - 1999	1987	Italy	Bari	Mytilus galloprovincialis	16
Giordano et al. (1989)	1980 - 1999	1987	Italy	Bari	Mytilus galloprovincialis	15
Giordano et al. (1989)	1980 - 1999	1987	Italy	Manfredonia	Mytilus galloprovincialis	19
Giordano et al. (1989)	1980 - 1999	1987	Italy	Manfredonia	Mytilus galloprovincialis	20
Giordano et al. (1989)	1980 - 1999	1987	Italy	Manfredonia	Mytilus galloprovincialis	16
Giordano et al. (1989)	1980 - 1999	1987	Italy	Termoli	Mytilus galloprovincialis	18
Giordano et al. (1989)	1980 - 1999	1987	Italy	Termoli	Mytilus galloprovincialis	20
Giordano et al. (1989)	1980 - 1999	1987	Italy	Termoli	Mytilus galloprovincialis	16
Capelli et al. (1983)	1980 - 1999	1980	Italy	coast of Genoa	Mytilus galloprovincialis	10
Capelli et al. (1983)	1980 - 1999	1980	Italy	coast of Genoa	Mytilus galloprovincialis	30
Capelli et al. (1983)	1980 - 1999	1980	Italy	coast of Genoa	Mytilus galloprovincialis	65
Mikac et al. (1985)	1980 - 1999	1980	Croatia	Kastela Bay	Mytilus galloprovincialis	1600
Mikac et al. (1985)	1980 - 1999	1980	Croatia	Kastela Bay	Mytilus galloprovincialis	500
Mikac et al. (1985)	1980 - 1999	1980	Croatia	Kastela Bay	Mytilus galloprovincialis	200
Mikac et al. (1985)	1980 - 1999	1980	Croatia	Kastela Bay	Mytilus galloprovincialis	2400
Mikac et al. (1985)	1980 - 1999	1980	Croatia	Kastela Bay	Mytilus galloprovincialis	800
Mikac et al. (1985)	1980 - 1999	1980	Croatia	Kastela Bay	Mytilus galloprovincialis	800
Mikac et al. (1985)	1980 - 1999	1980	Croatia	Kastela Bay	Mytilus galloprovincialis	12400
Mikac et al. (1985)	1980 - 1999	1980	Croatia	Kastela Bay	Mytilus galloprovincialis	26900
Mikac et al. (1985)	1980 - 1999	1980	Croatia	Kastela Bay	Mytilus galloprovincialis	19100
Mikac et al. (1985)	1980 - 1999	1981	Croatia	Kastela Bay	Mytilus galloprovincialis	25600
Mikac et al. (1985)	1980 - 1999	1981	Croatia	Kastela Bay	Mytilus galloprovincialis	16500
Mikac et al. (1985)	1980 - 1999	1981	Croatia	Kastela Bay	Mytilus galloprovincialis	12200
Mikac et al. (1985)	1980 - 1999	1981	Croatia	Kastela Bay	Mytilus galloprovincialis	100
Mikac et al. (1985)	1980 - 1999	1981	Croatia	Kastela Bay	Mytilus galloprovincialis	4500
Mikac et al. (1985)	1980 - 1999	1981	Croatia	Kastela Bay	Mytilus galloprovincialis	14400
Mikac et al. (1985)	1980 - 1999	1981	Croatia	Kastela Bay	Mytilus galloprovincialis	14400
Usero et al. (1997)	1980 - 1999	1996	Spain	Guadiana, Province of Huelva	Ruditapes decussatus	61
Usero et al. (1997)	1980 - 1999	1996	Spain	Carreras, Province of Huelva	Ruditapes decussatus	47
Usero et al. (1997)	1980 - 1999	1996	Spain	Piedras Rivers, Province of Huelva	Ruditapes decussatus	69
Usero et al. (1997)	1980 - 1999	1996	Spain	Cádiz, Province of Cádiz	Ruditapes decussatus	57
Usero et al. (1997)	1980 - 1999	1996	Spain	Cádiz, Province of Cádiz	Ruditapes decussatus	71
Usero et al. (1997)	1980 - 1999	1996	Spain	Barbate river, Province of Cádiz	Ruditapes decussatus	11
Usero et al. (1997)	1980 - 1999	1996	Spain	Algeciras Bay, Province of Cádiz	Ruditapes decussatus	15
Riisgard et al. (1985)	1980 - 1999	1982 - 1983	Denmark	"Cheminova" factory	Mytilus edulis	164.2
Riisgard et al. (1985)	1980 - 1999	1982 - 1983	Denmark	"Cheminova" factory	Mytilus edulis	131.5
Riisgard et al. (1985)	1980 - 1999	1982 - 1983	Denmark	"Cheminova" factory	Mytilus edulis	479.6
Riisgard et al. (1985)	1980 - 1999	1982 - 1983	Denmark	"Cheminova" factory	Mytilus edulis	129.4
Riisgard et al. (1985)	1980 - 1999	1982 - 1983	Denmark	"Cheminova" factory	Mytilus edulis	116.9
Riisgard et al. (1985)	1980 - 1999	1982 - 1983	Denmark	"Cheminova" factory	Mytilus edulis	563.3
Riisgard et al. (1985)	1980 - 1999	1982 - 1983	Denmark	"Cheminova" factory	Macoma balthica	1398
Riisgard et al. (1985)	1980 - 1999	1982 - 1983	Denmark	"Cheminova" factory	Macoma balthica	1376
Riisgard et al. (1985)	1980 - 1999	1982 - 1983	Denmark	"Cheminova" factory	Macoma balthica	1225
Riisgard et al. (1985)	1980 - 1999	1982 - 1983	Denmark	"Cheminova" factory	Macoma balthica	1109
Riisgard et al. (1985)	1980 - 1999	1982 - 1983	Denmark	"Cheminova" factory	Macoma balthica	1413
Riisgard et al. (1985)	1980 - 1999	1982 - 1983	Denmark	"Cheminova" factory	Macoma balthica	1265
Riisgard et al. (1985)	1980 - 1999	1982 - 1983	Denmark	"Cheminova" factory	Macoma balthica	1164
Riisgard et al. (1985)	1980 - 1999	1982 - 1983	Denmark	"Cheminova" factory	Macoma balthica	1066
Riisgard et al. (1985)	1980 - 1999	1982 - 1983	Denmark	"Cheminova" factory	Macoma balthica	1222
Riisgard et al. (1985)	1980 - 1999	1982 - 1983	Denmark	"Cheminova" factory	Macoma balthica	1195
Riisgard et al. (1985)	1980 - 1999	1982 - 1983	Denmark	"Cheminova" factory	Macoma balthica	1175
Riisgard et al. (1985)	1980 - 1999	1982 - 1983	Denmark	"Cheminova" factory	Macoma balthica	1516
Kawaguchi et al. (1999)	1980 - 1999	1986 - 1993	United Stades	South Carolina	Crassostrea virginica	28.4
Kawaguchi et al. (1999)	1980 - 1999	1986 - 1993	United Stades	South Carolina	Crassostrea virginica	31.9
Kawaguchi et al. (1999)	1980 - 1999	1986 - 1993	United Stades	South Carolina	Crassostrea virginica	22.6
Kawaguchi et al. (1999)	1980 - 1999	1986 - 1993	United Stades	South Carolina	Crassostrea virginica	20.9
Kawaguchi et al. (1999)	1980 - 1999	1986 - 1993	United Stades	South Carolina	Crassostrea virginica	21.1
Kawaguchi et al. (1999)	1980 - 1999	1986 - 1993	United Stades	South Carolina	Crassostrea virginica	20.4
Kawaguchi et al. (1999)	1980 - 1999	1986 - 1993	United Stades	South Carolina	Crassostrea virginica	24.6
Kawaguchi et al. (1999)	1980 - 1999	1986 - 1993	United Stades	South Carolina	Crassostrea virginica	205
Kawaguchi et al. (1999)	1980 - 1999	1986 - 1993	United Stades	South Carolina	Crassostrea virginica	26.8
Kawaguchi et al. (1999)	1980 - 1999	1986 - 1993	United Stades	South Carolina	Crassostrea virginica	19.5
Esposito et al. (2021)	2000 - 2022	2017	Italy	Calich Lagoon	Mytilus galloprovincialis	13
Esposito et al. (2021)	2000 - 2022	2017	Italy	Calich Lagoon	Mytilus galloprovincialis	13
Esposito et al. (2021)	2000 - 2022	2017	Italy	Calich Lagoon	Mytilus galloprovincialis	13
Esposito et al. (2021)	2000 - 2022	2017	Italy	Calich Lagoon	Mytilus galloprovincialis	21
Esposito et al. (2021)	2000 - 2022	2017	Italy	Calich Lagoon	Mytilus galloprovincialis	21
Esposito et al. (2021)	2000 - 2022	2017	Italy	Calich Lagoon	Mytilus galloprovincialis	21
Esposito et al. (2021)	2000 - 2022	2017	Italy	Calich Lagoon	Mytilus galloprovincialis	11
Esposito et al. (2021)	2000 - 2022	2017	Italy	Calich Lagoon	Mytilus galloprovincialis	11
Esposito et al. (2021)	2000 - 2022	2017	Italy	Calich Lagoon	Mytilus galloprovincialis	11
Papetti and Rossi (2009)	2000 - 2022	2007	Italy	Tevere	Ruditapes decussatus	5
Papetti and Rossi (2009)	2000 - 2022	2007	Italy	Tevere	Mytilus galloprovincialis	11
Brambilla et al. (2013)	2000 - 2022	2009	Italy	Tevere	Acanthocardia tuberculata	65
Brambilla et al. (2013)	2000 - 2022	2009	Italy	Tevere	Acanthocardia tuberculata	10
Brambilla et al. (2013)	2000 - 2022	2009	Italy	Tevere	Acanthocardia tuberculata	230
Brambilla et al. (2013)	2000 - 2022	2009	Italy	Tevere	Callista chione	29
Brambilla et al. (2013)	2000 - 2022	2009	Italy	Tevere	Callista chione	10
Brambilla et al. (2013)	2000 - 2022	2009	Italy	Tevere	Callista chione	60
Brambilla et al. (2013)	2000 - 2022	2009	Italy	Tevere	Chamelea gallina	39
Brambilla et al. (2013)	2000 - 2022	2009	Italy	Tevere	Chamelea gallina	10
Brambilla et al. (2013)	2000 - 2022	2009	Italy	Tevere	Chamelea gallina	190
Brambilla et al. (2013)	2000 - 2022	2009	Italy	Tevere	Mimachlamys varia	23
Brambilla et al. (2013)	2000 - 2022	2009	Italy	Tevere	Mimachlamys varia	10
Brambilla et al. (2013)	2000 - 2022	2009	Italy	Tevere	Mimachlamys varia	90
Brambilla et al. (2013)	2000 - 2022	2009	Italy	Tevere	Magallana gigas	32
Brambilla et al. (2013)	2000 - 2022	2009	Italy	Tevere	Magallana gigas	10
Brambilla et al. (2013)	2000 - 2022	2009	Italy	Tevere	Magallana gigas	90
Brambilla et al. (2013)	2000 - 2022	2009	Italy	Tevere	Donax trunculus	23
Brambilla et al. (2013)	2000 - 2022	2009	Italy	Tevere	Donax trunculus	10
Brambilla et al. (2013)	2000 - 2022	2009	Italy	Tevere	Donax trunculus	50
Brambilla et al. (2013)	2000 - 2022	2009	Italy	Tevere	Ensis siliqua	101
Brambilla et al. (2013)	2000 - 2022	2009	Italy	Tevere	Ensis siliqua	30
Brambilla et al. (2013)	2000 - 2022	2009	Italy	Tevere	Ensis siliqua	590
Brambilla et al. (2013)	2000 - 2022	2009	Italy	Tevere	Mactra corallina	20
Brambilla et al. (2013)	2000 - 2022	2009	Italy	Tevere	Mactra corallina	10
Brambilla et al. (2013)	2000 - 2022	2009	Italy	Tevere	Mactra corallina	30
Brambilla et al. (2013)	2000 - 2022	2009	Italy	Tevere	Mytilus galloprovincialis	30
Brambilla et al. (2013)	2000 - 2022	2009	Italy	Tevere	Mytilus galloprovincialis	5
Brambilla et al. (2013)	2000 - 2022	2009	Italy	Tevere	Mytilus galloprovincialis	470
Brambilla et al. (2013)	2000 - 2022	2009	Italy	Tevere	Ostrea edulis	40
Brambilla et al. (2013)	2000 - 2022	2009	Italy	Tevere	Ostrea edulis	20
Brambilla et al. (2013)	2000 - 2022	2009	Italy	Tevere	Ostrea edulis	60
Brambilla et al. (2013)	2000 - 2022	2009	Italy	Tevere	Pecten jacobaeus	16
Brambilla et al. (2013)	2000 - 2022	2009	Italy	Tevere	Pecten jacobaeus	10
Brambilla et al. (2013)	2000 - 2022	2009	Italy	Tevere	Pecten jacobaeus	30
Brambilla et al. (2013)	2000 - 2022	2009	Italy	Tevere	Ruditapes decussatus	64
Brambilla et al. (2013)	2000 - 2022	2009	Italy	Tevere	Ruditapes decussatus	10
Brambilla et al. (2013)	2000 - 2022	2009	Italy	Tevere	Ruditapes decussatus	190
Brambilla et al. (2013)	2000 - 2022	2009	Italy	Tevere	Ruditapes philippinarum	41
Brambilla et al. (2013)	2000 - 2022	2009	Italy	Tevere	Ruditapes philippinarum	10
Brambilla et al. (2013)	2000 - 2022	2009	Italy	Tevere	Ruditapes philippinarum	190
Brambilla et al. (2013)	2000 - 2022	2009	Italy	Tevere	Venus verrucosa	58
Brambilla et al. (2013)	2000 - 2022	2009	Italy	Tevere	Venus verrucosa	50
Brambilla et al. (2013)	2000 - 2022	2009	Italy	Tevere	Venus verrucosa	60
Piras et al. (2013)	2000 - 2022	2012	Italy	Sardegna	Mytilus galloprovincialis	9
Piras et al. (2013)	2000 - 2022	2012	Italy	Sardegna	Ruditapes spp.	6
Piras et al. (2013)	2000 - 2022	2012	Italy	Sardegna	Magallana gigas	17
Bogdanovic et al. (2014)	2000 - 2022	2012	Croatia	Adriatic coast	Mimachlamys varia	26
Bogdanovic et al. (2014)	2000 - 2022	2011	Croatia	Adriatic coast	Mimachlamys varia	512
Bogdanovic et al. (2014)	2000 - 2022	2012	Croatia	Adriatic coast	Mimachlamys varia	32
Bogdanovic et al. (2014)	2000 - 2022	2011	Croatia	Adriatic coast	Mimachlamys varia	438
Bogdanovic et al. (2014)	2000 - 2022	2012	Croatia	Adriatic coast	Mimachlamys varia	59
Bogdanovic et al. (2014)	2000 - 2022	2011	Croatia	Adriatic coast	Mimachlamys varia	226
Bogdanovic et al. (2014)	2000 - 2022	2012	Croatia	Adriatic coast	Mytilus galloprovincialis	36
Bogdanovic et al. (2014)	2000 - 2022	2011	Croatia	Adriatic coast	Mytilus galloprovincialis	58
Bogdanovic et al. (2014)	2000 - 2022	2012	Croatia	Adriatic coast	Mytilus galloprovincialis	40
Bogdanovic et al. (2014)	2000 - 2022	2011	Croatia	Adriatic coast	Mytilus galloprovincialis	357
Bogdanovic et al. (2014)	2000 - 2022	2012	Croatia	Adriatic coast	Mytilus galloprovincialis	45
Bogdanovic et al. (2014)	2000 - 2022	2011	Croatia	Adriatic coast	Mytilus galloprovincialis	61
Bogdanovic et al. (2014)	2000 - 2022	2012	Croatia	Adriatic coast	Mytilus galloprovincialis	44
Bogdanovic et al. (2014)	2000 - 2022	2011	Croatia	Adriatic coast	Mytilus galloprovincialis	154
Bogdanovic et al. (2014)	2000 - 2022	2012	Croatia	Adriatic coast	Mytilus galloprovincialis	29
Bogdanovic et al. (2014)	2000 - 2022	2011	Croatia	Adriatic coast	Mytilus galloprovincialis	64
Bogdanovic et al. (2014)	2000 - 2022	2012	Croatia	Adriatic coast	Mytilus galloprovincialis	32
Bogdanovic et al. (2014)	2000 - 2022	2011	Croatia	Adriatic coast	Mytilus galloprovincialis	512
Bogdanovic et al. (2014)	2000 - 2022	2012	Croatia	Adriatic coast	Mytilus galloprovincialis	34
Bogdanovic et al. (2014)	2000 - 2022	2011	Croatia	Adriatic coast	Mytilus galloprovincialis	111
Bogdanovic et al. (2014)	2000 - 2022	2012	Croatia	Adriatic coast	Mytilus galloprovincialis	42
Bogdanovic et al. (2014)	2000 - 2022	2011	Croatia	Adriatic coast	Mytilus galloprovincialis	108
Bogdanovic et al. (2014)	2000 - 2022	2012	Croatia	Adriatic coast	Mytilus galloprovincialis	37
Bogdanovic et al. (2014)	2000 - 2022	2011	Croatia	Adriatic coast	Mytilus galloprovincialis	235
Bogdanovic et al. (2014)	2000 - 2022	2012	Croatia	Adriatic coast	Mytilus galloprovincialis	41
Bogdanovic et al. (2014)	2000 - 2022	2011	Croatia	Adriatic coast	Mytilus galloprovincialis	143
Bogdanovic et al. (2014)	2000 - 2022	2012	Croatia	Adriatic coast	Mytilus galloprovincialis	43
Bogdanovic et al. (2014)	2000 - 2022	2011	Croatia	Adriatic coast	Mytilus galloprovincialis	680
Bogdanovic et al. (2014)	2000 - 2022	2012	Croatia	Adriatic coast	Mytilus galloprovincialis	224
Bogdanovic et al. (2014)	2000 - 2022	2011	Croatia	Adriatic coast	Mytilus galloprovincialis	57
Bogdanovic et al. (2014)	2000 - 2022	2012	Croatia	Adriatic coast	Venus verrucosa	160
Bogdanovic et al. (2014)	2000 - 2022	2011	Croatia	Adriatic coast	Venus verrucosa	378
Bogdanovic et al. (2014)	2000 - 2022	2012	Croatia	Adriatic coast	Venus verrucosa	88
Bogdanovic et al. (2014)	2000 - 2022	2011	Croatia	Adriatic coast	Venus verrucosa	49
Bogdanovic et al. (2014)	2000 - 2022	2012	Croatia	Adriatic coast	Mytilus galloprovincialis	245
Bogdanovic et al. (2014)	2000 - 2022	2011	Croatia	Adriatic coast	Mytilus galloprovincialis	43
Bogdanovic et al. (2014)	2000 - 2022	2012	Croatia	Adriatic coast	Mytilus galloprovincialis	227
Bogdanovic et al. (2014)	2000 - 2022	2011	Croatia	Adriatic coast	Mytilus galloprovincialis	5
Firth et al. (2019)	2000 - 2022	2016	South Africa	Saldanha Bay	Choromytilus meridionalis	3
Firth et al. (2019)	2000 - 2022	2016	South Africa	Saldanha Bay	Choromytilus meridionalis	2
Firth et al. (2019)	2000 - 2022	2016	South Africa	Saldanha Bay	Choromytilus meridionalis	10
Firth et al. (2019)	2000 - 2022	2016	South Africa	Saldanha Bay	Mytilus galloprovincialis	4
Firth et al. (2019)	2000 - 2022	2016	South Africa	Saldanha Bay	Mytilus galloprovincialis	2
Firth et al. (2019)	2000 - 2022	2016	South Africa	Saldanha Bay	Mytilus galloprovincialis	5
Slavka et al. (2011)	2000 - 2022	2009	Montenegro	Herceg Novi, Boka Kotorska Bay	Mytilus galloprovincialis	100
Slavka et al. (2011)	2000 - 2022	2009	Montenegro	Herceg Novi, Boka Kotorska Bay	Mytilus galloprovincialis	20
Slavka et al. (2011)	2000 - 2022	2009	Montenegro	Herceg Novi, Boka Kotorska Bay	Mytilus galloprovincialis	170
Slavka et al. (2011)	2000 - 2022	2009	Montenegro	Steva Stasija	Mytilus galloprovincialis	50
Slavka et al. (2011)	2000 - 2022	2009	Montenegro	Steva Stasija	Mytilus galloprovincialis	10
Slavka et al. (2011)	2000 - 2022	2009	Montenegro	Steva Stasija	Mytilus galloprovincialis	150
Slavka et al. (2011)	2000 - 2022	2009	Montenegro	Kukuljina	Mytilus galloprovincialis	60
Slavka et al. (2011)	2000 - 2022	2009	Montenegro	Kukuljina	Mytilus galloprovincialis	30
Slavka et al. (2011)	2000 - 2022	2009	Montenegro	Kukuljina	Mytilus galloprovincialis	130
Slavka et al. (2011)	2000 - 2022	2009	Montenegro	Krasci	Mytilus galloprovincialis	80
Slavka et al. (2011)	2000 - 2022	2009	Montenegro	Krasci	Mytilus galloprovincialis	40
Slavka et al. (2011)	2000 - 2022	2009	Montenegro	Krasci	Mytilus galloprovincialis	120
Slavka et al. (2011)	2000 - 2022	2009	Montenegro	Bar, open coastal	Mytilus galloprovincialis	90
Slavka et al. (2011)	2000 - 2022	2009	Montenegro	Bar, open coastal	Mytilus galloprovincialis	40
Slavka et al. (2011)	2000 - 2022	2009	Montenegro	Bar, open coastal	Mytilus galloprovincialis	170
Slavka et al. (2011)	2000 - 2022	2009	Montenegro	Rt. Djeran, open coastal	Mytilus galloprovincialis	20
Slavka et al. (2011)	2000 - 2022	2009	Montenegro	Rt. Djeran, open coastal	Mytilus galloprovincialis	10
Slavka et al. (2011)	2000 - 2022	2009	Montenegro	Rt. Djeran, open coastal	Mytilus galloprovincialis	20
Olmedo et al. (2013)	2000 - 2022	2010	Italy	Mediterranean Sea	Chamelea gallina	3
Olmedo et al. (2013)	2000 - 2022	2010	Italy	Mediterranean Sea	Chamelea gallina	0
Olmedo et al. (2013)	2000 - 2022	2010	Italy	Mediterranean Sea	Chamelea gallina	39
Olmedo et al. (2013)	2000 - 2022	2010	Spain	Galicia	Mytilus edulis	0
Olmedo et al. (2013)	2000 - 2022	2010	Spain	Galicia	Mytilus edulis	0
Olmedo et al. (2013)	2000 - 2022	2010	Spain	Galicia	Mytilus edulis	0
Mok et al. (2014)	2000 - 2022	2008	South Korea	Changseon coast	Mytilus galloprovincialis	8
Mok et al. (2014)	2000 - 2022	2008	South Korea	Changseon coast	Mytilus galloprovincialis	3
Mok et al. (2014)	2000 - 2022	2008	South Korea	Changseon coast	Mytilus galloprovincialis	15
Mok et al. (2014)	2000 - 2022	2008	South Korea	Changseon coast	Mytilus galloprovincialis	6
Mok et al. (2014)	2000 - 2022	2008	South Korea	Changseon coast	Mytilus galloprovincialis	4
Mok et al. (2014)	2000 - 2022	2008	South Korea	Changseon coast	Mytilus galloprovincialis	8
Mok et al. (2014)	2000 - 2022	2008	South Korea	Changseon coast	Mytilus galloprovincialis	6
Mok et al. (2014)	2000 - 2022	2008	South Korea	Changseon coast	Mytilus galloprovincialis	3
Mok et al. (2014)	2000 - 2022	2008	South Korea	Changseon coast	Mytilus galloprovincialis	10
Coimbra (2003)	2000 - 2022	2001	Brazil	Sepetiba Bay	Anomalocardia brasiliana	41
Coimbra (2003)	2000 - 2022	2001	Brazil	Sepetiba Bay	Anomalocardia brasiliana	6
Coimbra (2003)	2000 - 2022	2001	Brazil	Sepetiba Bay	Anomalocardia brasiliana	120
Coimbra (2003)	2000 - 2022	2001	Brazil	Sepetiba Bay	Mytella guyanensis	23
Coimbra (2003)	2000 - 2022	2001	Brazil	Sepetiba Bay	Mytella guyanensis	8
Coimbra (2003)	2000 - 2022	2001	Brazil	Sepetiba Bay	Mytella guyanensis	36
Coimbra (2003)	2000 - 2022	2001	Brazil	Sepetiba Bay	Anomalocardia brasiliana	81
Coimbra (2003)	2000 - 2022	2001	Brazil	Sepetiba Bay	Anomalocardia brasiliana	54
Coimbra (2003)	2000 - 2022	2001	Brazil	Sepetiba Bay	Anomalocardia brasiliana	108
Coimbra (2003)	2000 - 2022	2001	Brazil	Sepetiba Bay	Mytella guyanensis	65
Coimbra (2003)	2000 - 2022	2001	Brazil	Sepetiba Bay	Mytella guyanensis	51
Coimbra (2003)	2000 - 2022	2001	Brazil	Sepetiba Bay	Mytella guyanensis	97
Present study	2000 - 2022	2021	Colombia	Ciénaga Grande de Santa Marta	Crassostrea rhizophorae	22.5118
Present study	2000 - 2022	2021	Colombia	Ciénaga Grande de Santa Marta	Crassostrea rhizophorae	23.8554
Present study	2000 - 2022	2021	Colombia	Ciénaga Grande de Santa Marta	Crassostrea rhizophorae	11.8159
Present study	2000 - 2022	2021	Colombia	Ciénaga Grande de Santa Marta	Crassostrea rhizophorae	15.1846
Present study	2000 - 2022	2021	Colombia	Ciénaga Grande de Santa Marta	Crassostrea rhizophorae	9.35576
Present study	2000 - 2022	2021	Colombia	Ciénaga Grande de Santa Marta	Crassostrea rhizophorae	29.2479
Present study	2000 - 2022	2021	Colombia	Ciénaga Grande de Santa Marta	Crassostrea rhizophorae	7.76951
Present study	2000 - 2022	2021	Colombia	Ciénaga Grande de Santa Marta	Crassostrea rhizophorae	9.98209
Present study	2000 - 2022	2021	Colombia	Cispatá Bay	Crassostrea rhizophorae	19.1152
Present study	2000 - 2022	2021	Colombia	Cispatá Bay	Crassostrea rhizophorae	25.3052
Present study	2000 - 2022	2021	Colombia	Cispatá Bay	Crassostrea rhizophorae	66.826
Present study	2000 - 2022	2021	Colombia	Cispatá Bay	Crassostrea rhizophorae	21.523
Present study	2000 - 2022	2021	Colombia	Cispatá Bay	Crassostrea rhizophorae	20.7463
Present study	2000 - 2022	2021	Colombia	Cispatá Bay	Crassostrea rhizophorae	24.3463
Present study	2000 - 2022	2021	Colombia	Cispatá Bay	Crassostrea rhizophorae	39.7944
Present study	2000 - 2022	2021	Colombia	Cispatá Bay	Crassostrea rhizophorae	35.2626
Present study	2000 - 2022	2021	Colombia	Cispatá Bay	Crassostrea rhizophorae	25.704
Present study	2000 - 2022	2022	Colombia	Ciénaga Grande de Santa Marta	Crassostrea rhizophorae	2.96831
Present study	2000 - 2022	2022	Colombia	Ciénaga Grande de Santa Marta	Crassostrea rhizophorae	3.83796
Present study	2000 - 2022	2022	Colombia	Ciénaga Grande de Santa Marta	Crassostrea rhizophorae	9.5404
Present study	2000 - 2022	2022	Colombia	Ciénaga Grande de Santa Marta	Crassostrea rhizophorae	28.1634
Present study	2000 - 2022	2022	Colombia	Ciénaga Grande de Santa Marta	Crassostrea rhizophorae	14.6473
Present study	2000 - 2022	2022	Colombia	Ciénaga Grande de Santa Marta	Crassostrea rhizophorae	10.6355
Present study	2000 - 2022	2022	Colombia	Ciénaga Grande de Santa Marta	Crassostrea rhizophorae	55.0779
Present study	2000 - 2022	2022	Colombia	Ciénaga Grande de Santa Marta	Crassostrea rhizophorae	28.8829
Present study	2000 - 2022	2022	Colombia	Ciénaga Grande de Santa Marta	Crassostrea rhizophorae	37.9685
Present study	2000 - 2022	2022	Colombia	Cispatá Bay	Crassostrea rhizophorae	13.9641
Present study	2000 - 2022	2022	Colombia	Cispatá Bay	Crassostrea rhizophorae	14.1733
Present study	2000 - 2022	2022	Colombia	Cispatá Bay	Crassostrea rhizophorae	12.0866
Present study	2000 - 2022	2022	Colombia	Cispatá Bay	Crassostrea rhizophorae	15.5068
Present study	2000 - 2022	2022	Colombia	Cispatá Bay	Crassostrea rhizophorae	6.95891
Present study	2000 - 2022	2022	Colombia	Cispatá Bay	Crassostrea rhizophorae	10.8077
Present study	2000 - 2022	2022	Colombia	Cispatá Bay	Crassostrea rhizophorae	8.88554
Present study	2000 - 2022	2022	Colombia	Cispatá Bay	Crassostrea rhizophorae	33.2697
Present study	2000 - 2022	2022	Colombia	Cispatá Bay	Crassostrea rhizophorae	13.8287
Present study	2000 - 2022	2021	Colombia	Ciénaga Grande de Santa Marta	Crassostrea rhizophorae	15.6009
Present study	2000 - 2022	2021	Colombia	Ciénaga Grande de Santa Marta	Crassostrea rhizophorae	17.3469
Present study	2000 - 2022	2021	Colombia	Ciénaga Grande de Santa Marta	Crassostrea rhizophorae	24.5044
Present study	2000 - 2022	2021	Colombia	Ciénaga Grande de Santa Marta	Crassostrea rhizophorae	8.79272
Present study	2000 - 2022	2021	Colombia	Ciénaga Grande de Santa Marta	Crassostrea rhizophorae	13.4826
Present study	2000 - 2022	2021	Colombia	Ciénaga Grande de Santa Marta	Crassostrea rhizophorae	13.2534
Present study	2000 - 2022	2021	Colombia	Ciénaga Grande de Santa Marta	Crassostrea rhizophorae	5.98019
Present study	2000 - 2022	2021	Colombia	Ciénaga Grande de Santa Marta	Crassostrea rhizophorae	39.6753
Present study	2000 - 2022	2021	Colombia	Ciénaga Grande de Santa Marta	Crassostrea rhizophorae	11.7622
Present study	2000 - 2022	2021	Colombia	Cispatá Bay	Crassostrea rhizophorae	15.8339
Present study	2000 - 2022	2021	Colombia	Cispatá Bay	Crassostrea rhizophorae	30.568
Present study	2000 - 2022	2021	Colombia	Cispatá Bay	Crassostrea rhizophorae	66.6259
Present study	2000 - 2022	2021	Colombia	Cispatá Bay	Crassostrea rhizophorae	40.7505
Present study	2000 - 2022	2021	Colombia	Cispatá Bay	Crassostrea rhizophorae	57.7988
Present study	2000 - 2022	2021	Colombia	Cispatá Bay	Crassostrea rhizophorae	30.0933
Present study	2000 - 2022	2021	Colombia	Cispatá Bay	Crassostrea rhizophorae	39.6553
Present study	2000 - 2022	2021	Colombia	Cispatá Bay	Crassostrea rhizophorae	45.5967
Present study	2000 - 2022	2021	Colombia	Cispatá Bay	Crassostrea rhizophorae	94.5194
Present study	2000 - 2022	2022	Colombia	Ciénaga Grande de Santa Marta	Crassostrea rhizophorae	7.76198
Present study	2000 - 2022	2022	Colombia	Ciénaga Grande de Santa Marta	Crassostrea rhizophorae	10.0076
Present study	2000 - 2022	2022	Colombia	Ciénaga Grande de Santa Marta	Crassostrea rhizophorae	24.4176
Present study	2000 - 2022	2022	Colombia	Ciénaga Grande de Santa Marta	Crassostrea rhizophorae	17.8606
Present study	2000 - 2022	2022	Colombia	Ciénaga Grande de Santa Marta	Crassostrea rhizophorae	14.9208
Present study	2000 - 2022	2022	Colombia	Ciénaga Grande de Santa Marta	Crassostrea rhizophorae	8.4857
Present study	2000 - 2022	2022	Colombia	Ciénaga Grande de Santa Marta	Crassostrea rhizophorae	8.93937
Present study	2000 - 2022	2022	Colombia	Ciénaga Grande de Santa Marta	Crassostrea rhizophorae	13.5782
Present study	2000 - 2022	2022	Colombia	Ciénaga Grande de Santa Marta	Crassostrea rhizophorae	6.88804
Present study	2000 - 2022	2022	Colombia	Cispatá Bay	Crassostrea rhizophorae	13.6193
Present study	2000 - 2022	2022	Colombia	Cispatá Bay	Crassostrea rhizophorae	14.8157
Present study	2000 - 2022	2022	Colombia	Cispatá Bay	Crassostrea rhizophorae	10.4714
Present study	2000 - 2022	2022	Colombia	Cispatá Bay	Crassostrea rhizophorae	29.3075
Present study	2000 - 2022	2022	Colombia	Cispatá Bay	Crassostrea rhizophorae	40.9565
Present study	2000 - 2022	2022	Colombia	Cispatá Bay	Crassostrea rhizophorae	42.4881
Present study	2000 - 2022	2022	Colombia	Cispatá Bay	Crassostrea rhizophorae	37.9714
Present study	2000 - 2022	2022	Colombia	Cispatá Bay	Crassostrea rhizophorae	19.0599
Present study	2000 - 2022	2022	Colombia	Cispatá Bay	Crassostrea rhizophorae	11.6093
Dang et al. (2022)	2000 - 2022	2021	Vietnam	Quang Ninh province	Saccostrea glomerata	110
Dang et al. (2022)	2000 - 2022	2021	Vietnam	Quang Ninh province	Saccostrea glomerata	180
Dang et al. (2022)	2000 - 2022	2021	Vietnam	Quang Ninh province	Saccostrea glomerata	220
Dang et al. (2022)	2000 - 2022	2021	Vietnam	Quang Ninh province	Saccostrea glomerata	70
Dang et al. (2022)	2000 - 2022	2021	Vietnam	Quang Ninh province	Saccostrea glomerata	50
Dang et al. (2022)	2000 - 2022	2021	Vietnam	Quang Ninh province	Saccostrea glomerata	150
Soegianto et al. (2020)	2000 - 2022	2019	Indonesia	East Java Coast	Tegillarca granosa	130
Soegianto et al. (2020)	2000 - 2022	2019	Indonesia	East Java Coast	Tegillarca granosa	1470
Soegianto et al. (2020)	2000 - 2022	2019	Indonesia	East Java Coast	Tegillarca granosa	20
Soegianto et al. (2020)	2000 - 2022	2019	Indonesia	East Java Coast	Tegillarca granosa	150
Soegianto et al. (2020)	2000 - 2022	2019	Indonesia	East Java Coast	Tegillarca granosa	120
Soegianto et al. (2020)	2000 - 2022	2019	Indonesia	East Java Coast	Tegillarca granosa	150
Soegianto et al. (2020)	2000 - 2022	2019	Indonesia	East Java Coast	Tegillarca granosa	120
Soegianto et al. (2020)	2000 - 2022	2019	Indonesia	East Java Coast	Tegillarca granosa	20
Giani et al. (2012)	2000 - 2022	2008	Italy	Marano Lagoon	Ruditapes philippinarum	65
Giani et al. (2012)	2000 - 2022	2008	Italy	Marano Lagoon	Ruditapes philippinarum	213
Giani et al. (2012)	2000 - 2022	2008	Italy	Marano Lagoon	Ruditapes philippinarum	217
Giani et al. (2012)	2000 - 2022	2008	Italy	Marano Lagoon	Ruditapes philippinarum	298
Giani et al. (2012)	2000 - 2022	2008	Italy	Marano Lagoon	Ruditapes philippinarum	462
Giani et al. (2012)	2000 - 2022	2008	Italy	Marano Lagoon	Ruditapes philippinarum	275
Giani et al. (2012)	2000 - 2022	2008	Italy	Marano Lagoon	Ruditapes philippinarum	105
Giani et al. (2012)	2000 - 2022	2008	Italy	Marano Lagoon	Ruditapes philippinarum	57
Giani et al. (2012)	2000 - 2022	2008	Italy	Marano Lagoon	Ruditapes philippinarum	74
Giani et al. (2012)	2000 - 2022	2008	Italy	Marano Lagoon	Ruditapes philippinarum	225
Giani et al. (2012)	2000 - 2022	2008	Italy	Marano Lagoon	Ruditapes philippinarum	238
Giani et al. (2012)	2000 - 2022	2008	Italy	Marano Lagoon	Ruditapes philippinarum	411
Giani et al. (2012)	2000 - 2022	2008	Italy	Marano Lagoon	Ruditapes philippinarum	623
Giani et al. (2012)	2000 - 2022	2008	Italy	Marano Lagoon	Ruditapes philippinarum	365
Giani et al. (2012)	2000 - 2022	2008	Italy	Marano Lagoon	Ruditapes philippinarum	54
Giani et al. (2012)	2000 - 2022	2008	Italy	Marano Lagoon	Ruditapes philippinarum	70
Giani et al. (2012)	2000 - 2022	2008	Italy	Marano Lagoon	Ruditapes philippinarum	283
Giani et al. (2012)	2000 - 2022	2008	Italy	Marano Lagoon	Ruditapes philippinarum	321
Giani et al. (2012)	2000 - 2022	2008	Italy	Marano Lagoon	Ruditapes philippinarum	497
Giani et al. (2012)	2000 - 2022	2008	Italy	Marano Lagoon	Ruditapes philippinarum	825
Giani et al. (2012)	2000 - 2022	2008	Italy	Marano Lagoon	Ruditapes philippinarum	572
Giani et al. (2012)	2000 - 2022	2008	Italy	Marano Lagoon	Ruditapes philippinarum	81
Giani et al. (2012)	2000 - 2022	2008	Italy	Marano Lagoon	Ruditapes philippinarum	252
Giani et al. (2012)	2000 - 2022	2008	Italy	Marano Lagoon	Ruditapes philippinarum	235
Giani et al. (2012)	2000 - 2022	2008	Italy	Marano Lagoon	Ruditapes philippinarum	985
Giani et al. (2012)	2000 - 2022	2008	Italy	Marano Lagoon	Ruditapes philippinarum	410
Giani et al. (2012)	2000 - 2022	2008	Italy	Marano Lagoon	Ruditapes philippinarum	90
Liang et al. (2003)	2000 - 2022	2003	China	WeiHai	Ruditapes philippinarum	8.4
Liang et al. (2003)	2000 - 2022	2003	China	WeiHai	Meretrix Meretrix	8
Liang et al. (2003)	2000 - 2022	2003	China	WeiHai	Sinonovacula constricta	7.3
Liang et al. (2003)	2000 - 2022	2003	China	WeiHai	Amusium spp.	13.9
Liang et al. (2003)	2000 - 2022	2003	China	WeiHai	Chlamys farreri	11.6
Liang et al. (2003)	2000 - 2022	2003	China	WeiHai	Crassostrea gigas	8.2
Liang et al. (2003)	2000 - 2022	2003	China	WeiHai	Mytilus edulis	9
Liang et al. (2003)	2000 - 2022	2003	China	WeiHai	Mya arenaria	13.8
Liang et al. (2003)	2000 - 2022	2003	China	PengLai	Mactra quadrangularis	15.6
Liang et al. (2003)	2000 - 2022	2003	China	PengLai	Ruditapes philippinarum	21.3
Liang et al. (2003)	2000 - 2022	2003	China	PengLai	Meretrix Meretrix	47.5
Liang et al. (2003)	2000 - 2022	2003	China	PengLai	Anadara kragoshimensis	26.5
Liang et al. (2003)	2000 - 2022	2003	China	PengLai	Amusium spp.	16.6
Liang et al. (2003)	2000 - 2022	2003	China	PengLai	Chlamys farreri	22.8
Liang et al. (2003)	2000 - 2022	2003	China	PengLai	Crassostrea gigas	37
Liang et al. (2003)	2000 - 2022	2003	China	PengLai	Mytilus edulis	40.6
Liang et al. (2003)	2000 - 2022	2003	China	PengLai	Mya arenaria	16.6
Liang et al. (2003)	2000 - 2022	2003	China	YangKou	Mactra quadrangularis	12.3
Liang et al. (2003)	2000 - 2022	2003	China	YangKou	Ruditapes philippinarum	12.5
Liang et al. (2003)	2000 - 2022	2003	China	YangKou	Meretrix Meretrix	10.4
Liang et al. (2003)	2000 - 2022	2003	China	YangKou	Sinonovacula constricta	8.4
Liang et al. (2003)	2000 - 2022	2003	China	YangKou	Anadara kragoshimensis	18
Liang et al. (2003)	2000 - 2022	2003	China	YangKou	Anadara kragoshimensis	27.7
Liang et al. (2003)	2000 - 2022	2003	China	TangGu	Mactra quadrangularis	5.6
Liang et al. (2003)	2000 - 2022	2003	China	TangGu	Meretrix Meretrix	4.8
Liang et al. (2003)	2000 - 2022	2003	China	TangGu	Sinonovacula constricta	8.7
Liang et al. (2003)	2000 - 2022	2003	China	TangGu	Anadara kragoshimensis	10.4
Liang et al. (2003)	2000 - 2022	2003	China	TangGu	Amusium spp.	10.8
Liang et al. (2003)	2000 - 2022	2003	China	TangGu	Crassostrea gigas	11.7
Liang et al. (2003)	2000 - 2022	2003	China	TangGu	Mya arenaria	11.6
Liang et al. (2003)	2000 - 2022	2003	China	TangGu	Mya arenaria	21.8
Liang et al. (2003)	2000 - 2022	2003	China	QinHuangDao	Mactra quadrangularis	13
Liang et al. (2003)	2000 - 2022	2003	China	QinHuangDao	Ruditapes philippinarum	13.9
Liang et al. (2003)	2000 - 2022	2003	China	QinHuangDao	Meretrix Meretrix	7.5
Liang et al. (2003)	2000 - 2022	2003	China	QinHuangDao	Sinonovacula constricta	14.4
Liang et al. (2003)	2000 - 2022	2003	China	QinHuangDao	Anadara kragoshimensis	11.2
Liang et al. (2003)	2000 - 2022	2003	China	QinHuangDao	Amusium spp.	9.7
Liang et al. (2003)	2000 - 2022	2003	China	QinHuangDao	Chlamys farreri	14.5
Liang et al. (2003)	2000 - 2022	2003	China	QinHuangDao	Crassostrea gigas	14.8
Liang et al. (2003)	2000 - 2022	2003	China	QinHuangDao	Mytilus edulis	8.9
Liang et al. (2003)	2000 - 2022	2003	China	HuLuDao	Mactra quadrangularis	25.2
Liang et al. (2003)	2000 - 2022	2003	China	HuLuDao	Ruditapes philippinarum	24.4
Liang et al. (2003)	2000 - 2022	2003	China	HuLuDao	Meretrix Meretrix	15.8
Liang et al. (2003)	2000 - 2022	2003	China	HuLuDao	Anadara kragoshimensis	38.4
Liang et al. (2003)	2000 - 2022	2003	China	YingKou	Mactra quadrangularis	18.7
Liang et al. (2003)	2000 - 2022	2003	China	YingKou	Ruditapes philippinarum	15.7
Liang et al. (2003)	2000 - 2022	2003	China	YingKou	Meretrix Meretrix	8.6
Liang et al. (2003)	2000 - 2022	2003	China	YingKou	Sinonovacula constricta	23.6
Liang et al. (2003)	2000 - 2022	2003	China	YingKou	Amusium spp.	18.8
Liang et al. (2003)	2000 - 2022	2003	China	YingKou	Mytilus edulis	19.6
Liang et al. (2003)	2000 - 2022	2003	China	DaLian	Mactra quadrangularis	12.6
Liang et al. (2003)	2000 - 2022	2003	China	DaLian	Ruditapes philippinarum	6.4
Liang et al. (2003)	2000 - 2022	2003	China	DaLian	Meretrix Meretrix	16.8
Liang et al. (2003)	2000 - 2022	2003	China	DaLian	Sinonovacula constricta	15.6
Liang et al. (2003)	2000 - 2022	2003	China	DaLian	Anadara kragoshimensis	14.4
Liang et al. (2003)	2000 - 2022	2003	China	DaLian	Amusium spp.	15.3
Liang et al. (2003)	2000 - 2022	2003	China	DaLian	Chlamys farreri	17.1
Liang et al. (2003)	2000 - 2022	2003	China	DaLian	Crassostrea gigas	13
Liang et al. (2003)	2000 - 2022	2003	China	DaLian	Mytilus edulis	17.1
Coelho et al. (2014)	2000 - 2022	2013	Portugal	Guadiana River Estuary	Scrobicularia plana	30
Coelho et al. (2014)	2000 - 2022	2013	Portugal	Guadiana River Estuary	Scrobicularia plana	30
Coelho et al. (2014)	2000 - 2022	2013	Portugal	Ria Formosa Lagoon	Scrobicularia plana	20
Coelho et al. (2014)	2000 - 2022	2013	Portugal	Ria Formosa Lagoon	Scrobicularia plana	20
Coelho et al. (2014)	2000 - 2022	2013	Portugal	Sado River Estuary	Scrobicularia plana	20
Coelho et al. (2014)	2000 - 2022	2013	Portugal	Sado River Estuary	Scrobicularia plana	30
Coelho et al. (2014)	2000 - 2022	2013	Portugal	Tagus River Estuary	Scrobicularia plana	60
Coelho et al. (2014)	2000 - 2022	2013	Portugal	Tagus River Estuary	Scrobicularia plana	30
Coelho et al. (2014)	2000 - 2022	2013	Portugal	Mondego River Estuary	Scrobicularia plana	20
Coelho et al. (2014)	2000 - 2022	2013	Portugal	Mondego River Estuary	Scrobicularia plana	20
Coelho et al. (2014)	2000 - 2022	2013	Portugal	Ria de Aveiro Lagoon	Scrobicularia plana	20
Coelho et al. (2014)	2000 - 2022	2013	Portugal	Ria de Aveiro Lagoon	Scrobicularia plana	220
Coelho et al. (2014)	2000 - 2022	2013	Portugal	Ria de Aveiro Lagoon	Scrobicularia plana	300
Coelho et al. (2014)	2000 - 2022	2013	Portugal	Ria de Aveiro Lagoon	Scrobicularia plana	600
Coelho et al. (2014)	2000 - 2022	2013	Portugal	Lima River Estuary	Scrobicularia plana	30
Coelho et al. (2014)	2000 - 2022	2013	Portugal	Guadiana River Estuary	Scrobicularia plana	20
Coelho et al. (2014)	2000 - 2022	2013	Portugal	Guadiana River Estuary	Scrobicularia plana	30
Coelho et al. (2014)	2000 - 2022	2013	Portugal	Ria Formosa Lagoon	Scrobicularia plana	20
Coelho et al. (2014)	2000 - 2022	2013	Portugal	Ria Formosa Lagoon	Scrobicularia plana	10
Coelho et al. (2014)	2000 - 2022	2013	Portugal	Sado River Estuary	Scrobicularia plana	20
Coelho et al. (2014)	2000 - 2022	2013	Portugal	Sado River Estuary	Scrobicularia plana	30
Coelho et al. (2014)	2000 - 2022	2013	Portugal	Tagus River Estuary	Scrobicularia plana	50
Coelho et al. (2014)	2000 - 2022	2013	Portugal	Tagus River Estuary	Scrobicularia plana	30
Coelho et al. (2014)	2000 - 2022	2013	Portugal	Mondego River Estuary	Scrobicularia plana	20
Coelho et al. (2014)	2000 - 2022	2013	Portugal	Mondego River Estuary	Scrobicularia plana	20
Coelho et al. (2014)	2000 - 2022	2013	Portugal	Ria de Aveiro Lagoon	Scrobicularia plana	20
Coelho et al. (2014)	2000 - 2022	2013	Portugal	Ria de Aveiro Lagoon	Scrobicularia plana	240
Coelho et al. (2014)	2000 - 2022	2013	Portugal	Ria de Aveiro Lagoon	Scrobicularia plana	320
Coelho et al. (2014)	2000 - 2022	2013	Portugal	Ria de Aveiro Lagoon	Scrobicularia plana	800
Coelho et al. (2014)	2000 - 2022	2013	Portugal	Lima River Estuary	Scrobicularia plana	20
Coelho et al. (2014)	2000 - 2022	2013	Portugal	Guadiana River Estuary	Scrobicularia plana	30
Coelho et al. (2014)	2000 - 2022	2013	Portugal	Guadiana River Estuary	Scrobicularia plana	20
Coelho et al. (2014)	2000 - 2022	2013	Portugal	Ria Formosa Lagoon	Scrobicularia plana	20
Coelho et al. (2014)	2000 - 2022	2013	Portugal	Ria Formosa Lagoon	Scrobicularia plana	20
Coelho et al. (2014)	2000 - 2022	2013	Portugal	Sado River Estuary	Scrobicularia plana	20
Coelho et al. (2014)	2000 - 2022	2013	Portugal	Sado River Estuary	Scrobicularia plana	30
Coelho et al. (2014)	2000 - 2022	2013	Portugal	Tagus River Estuary	Scrobicularia plana	40
Coelho et al. (2014)	2000 - 2022	2013	Portugal	Tagus River Estuary	Scrobicularia plana	30
Coelho et al. (2014)	2000 - 2022	2013	Portugal	Mondego River Estuary	Scrobicularia plana	10
Coelho et al. (2014)	2000 - 2022	2013	Portugal	Mondego River Estuary	Scrobicularia plana	10
Coelho et al. (2014)	2000 - 2022	2013	Portugal	Ria de Aveiro Lagoon	Scrobicularia plana	20
Coelho et al. (2014)	2000 - 2022	2013	Portugal	Ria de Aveiro Lagoon	Scrobicularia plana	250
Coelho et al. (2014)	2000 - 2022	2013	Portugal	Ria de Aveiro Lagoon	Scrobicularia plana	330
Coelho et al. (2014)	2000 - 2022	2013	Portugal	Ria de Aveiro Lagoon	Scrobicularia plana	1000
Coelho et al. (2014)	2000 - 2022	2013	Portugal	Lima River Estuary	Scrobicularia plana	20
Coelho et al. (2014)	2000 - 2022	2013	Portugal	Guadiana River Estuary	Scrobicularia plana	20
Coelho et al. (2014)	2000 - 2022	2013	Portugal	Guadiana River Estuary	Scrobicularia plana	20
Coelho et al. (2014)	2000 - 2022	2013	Portugal	Ria Formosa Lagoon	Scrobicularia plana	20
Coelho et al. (2014)	2000 - 2022	2013	Portugal	Ria Formosa Lagoon	Scrobicularia plana	10
Coelho et al. (2014)	2000 - 2022	2013	Portugal	Sado River Estuary	Scrobicularia plana	20
Coelho et al. (2014)	2000 - 2022	2013	Portugal	Sado River Estuary	Scrobicularia plana	20
Coelho et al. (2014)	2000 - 2022	2013	Portugal	Tagus River Estuary	Scrobicularia plana	30
Coelho et al. (2014)	2000 - 2022	2013	Portugal	Tagus River Estuary	Scrobicularia plana	20
Coelho et al. (2014)	2000 - 2022	2013	Portugal	Mondego River Estuary	Scrobicularia plana	10
Coelho et al. (2014)	2000 - 2022	2013	Portugal	Mondego River Estuary	Scrobicularia plana	10
Coelho et al. (2014)	2000 - 2022	2013	Portugal	Ria de Aveiro Lagoon	Scrobicularia plana	20
Coelho et al. (2014)	2000 - 2022	2013	Portugal	Ria de Aveiro Lagoon	Scrobicularia plana	270
Coelho et al. (2014)	2000 - 2022	2013	Portugal	Ria de Aveiro Lagoon	Scrobicularia plana	340
Coelho et al. (2014)	2000 - 2022	2013	Portugal	Ria de Aveiro Lagoon	Scrobicularia plana	1200
Coelho et al. (2014)	2000 - 2022	2013	Portugal	Lima River Estuary	Scrobicularia plana	10
Coelho et al. (2014)	2000 - 2022	2013	Portugal	Guadiana River Estuary	Scrobicularia plana	20
Coelho et al. (2014)	2000 - 2022	2013	Portugal	Guadiana River Estuary	Scrobicularia plana	20
Coelho et al. (2014)	2000 - 2022	2013	Portugal	Ria Formosa Lagoon	Scrobicularia plana	10
Coelho et al. (2014)	2000 - 2022	2013	Portugal	Ria Formosa Lagoon	Scrobicularia plana	10
Coelho et al. (2014)	2000 - 2022	2013	Portugal	Sado River Estuary	Scrobicularia plana	10
Coelho et al. (2014)	2000 - 2022	2013	Portugal	Sado River Estuary	Scrobicularia plana	20
Coelho et al. (2014)	2000 - 2022	2013	Portugal	Tagus River Estuary	Scrobicularia plana	30
Coelho et al. (2014)	2000 - 2022	2013	Portugal	Tagus River Estuary	Scrobicularia plana	20
Coelho et al. (2014)	2000 - 2022	2013	Portugal	Mondego River Estuary	Scrobicularia plana	10
Coelho et al. (2014)	2000 - 2022	2013	Portugal	Mondego River Estuary	Scrobicularia plana	10
Coelho et al. (2014)	2000 - 2022	2013	Portugal	Ria de Aveiro Lagoon	Scrobicularia plana	10
Coelho et al. (2014)	2000 - 2022	2013	Portugal	Ria de Aveiro Lagoon	Scrobicularia plana	290
Coelho et al. (2014)	2000 - 2022	2013	Portugal	Ria de Aveiro Lagoon	Scrobicularia plana	350
Coelho et al. (2014)	2000 - 2022	2013	Portugal	Ria de Aveiro Lagoon	Scrobicularia plana	1300
Coelho et al. (2014)	2000 - 2022	2013	Portugal	Lima River Estuary	Scrobicularia plana	10
Gutiérrez et al. (2007)	2000 - 2022	2006	Spain	Galicia	Mimachlamys varia	41.77
Gutiérrez et al. (2007)	2000 - 2022	2006	Spain	Galicia	Mimachlamys varia	23.13
Gutiérrez et al. (2007)	2000 - 2022	2006	Spain	Galicia	Mimachlamys varia	35.7
Gutiérrez et al. (2007)	2000 - 2022	2006	Spain	Galicia	Mimachlamys varia	8.6
Gutiérrez et al. (2007)	2000 - 2022	2006	Spain	Galicia	Mimachlamys varia	44.57
Gutiérrez et al. (2007)	2000 - 2022	2006	Spain	Galicia	Mimachlamys varia	48.33
Ding et al. (2022)	2000 - 2022	2019	China	Yellow sea and Bohai Sea	Mactra veneriformis	10
Ding et al. (2022)	2000 - 2022	2019	China	Yellow sea and Bohai Sea	Mactra veneriformis	60
Ding et al. (2022)	2000 - 2022	2019	China	Yellow sea and Bohai Sea	Mactra veneriformis	20
Ding et al. (2022)	2000 - 2022	2019	China	Yellow sea and Bohai Sea	Chlamys farreri	10
Ding et al. (2022)	2000 - 2022	2019	China	Yellow sea and Bohai Sea	Chlamys farreri	50
Ding et al. (2022)	2000 - 2022	2019	China	Yellow sea and Bohai Sea	Chlamys farreri	20
Ding et al. (2022)	2000 - 2022	2019	China	Yellow sea and Bohai Sea	Ruditapes philippinarum	10
Ding et al. (2022)	2000 - 2022	2019	China	Yellow sea and Bohai Sea	Ruditapes philippinarum	50
Ding et al. (2022)	2000 - 2022	2019	China	Yellow sea and Bohai Sea	Ruditapes philippinarum	22
Ding et al. (2022)	2000 - 2022	2019	China	Yellow sea and Bohai Sea	Magallana gigas	10
Ding et al. (2022)	2000 - 2022	2019	China	Yellow sea and Bohai Sea	Magallana gigas	70
Ding et al. (2022)	2000 - 2022	2019	China	Yellow sea and Bohai Sea	Magallana gigas	24
Ding et al. (2022)	2000 - 2022	2019	China	Yellow sea and Bohai Sea	Cyclina sinensis	10
Ding et al. (2022)	2000 - 2022	2019	China	Yellow sea and Bohai Sea	Cyclina sinensis	50
Ding et al. (2022)	2000 - 2022	2019	China	Yellow sea and Bohai Sea	Cyclina sinensis	20
