# Supplementary material for: Changes in mercury content in oysters in relation to sediment and seston content in the Colombian Caribbean lagoons
Source: PeerJ. 2025 Oct 24;13:e19868. doi: 10.7717/peerj.19868 (PMC12558159; doi:10.7717/peerj.19868)
Supplement: Supplemental Information 8 [file peerj-13-19868-s008.xlsx]

## Sheet: Hoja1
Country	Location	Avg ± EE	Author
		min-max
		(n data) (µg Hg/L wet weight)
Thailand	Chao Phraya	0,215 ± 0,215	Hungspreugs et al. (1989)
		0-0,43 (2)
	Tapi	0,027**
United Stades	Hawaii	0,001 ± 0,003 × 10⁻¹	Hunter et al. (1995)
		0,001-0,003 (7)
Croatia	Adriatic Sea	0,08 ± 0,013	Kosta et al. (1978)
		0,01-0,23 (22)
South Korea	Tongyeong	0,002 ± 0,003 × 10⁻¹	Mok et al. (2015)
		0,005 × 10⁻¹-0,004 (18)
China	Tianjin Reserv	0,007 ± 0,005	Zhang et al. (2016)
		0,008 × 10⁻¹-0,02 (4)
Italy	Livorno	6,4 ± 0,1	Berhnard (1988)
		6,3-6,5 (2)
	Gombo	4,35 ± 0,85
		3,5-5,2 (2)
	Armo	4,25 ± 2,55
		1,7-6,8 (2)
	Tirrenia	2,5 ± 0,3
		2,2-2,8 (2)
	Luvorno	2,65 ± 0,95
		1,7-3,6 (2)
	Salvay	8,55 ± 3,65
		4,9-12,2 (2)
	Albegna	3,15 ± 1,25
		1,9-4,4 (2)
	Orbetello	7,05 ± 3,45
		3,6-10,5 (2)
	Gorgona Island	5,65 ± 2,45
		3,2-8,1 (2)
	Capraia Island	4,95 ± 1,15
		3,8-6,1 (2)
	Corsica	5,65 ± 0,95
		4,7-6,6 (2)
Colombia	Cispatá Bay	0,005 × 10⁻¹ ± 0	Marrugo-Negrete and Paternina-Uribe (2011)
		0,005 × 10⁻¹-0,005 × 10⁻¹ (4)
	Caño Palermo	0,005 × 10⁻¹**
	Ciénaga La Soledad	0,005 × 10⁻¹ ± 0
		0,005 × 10⁻¹-0,005 × 10⁻¹ (4)
	CGSM	0,003 × 10⁻¹ ± 0,009 × 10⁻2	Present study
		0,001× 10⁻¹-0,006 × 10⁻¹ (6)
	Cispatá Bay	0,005 × 10⁻¹ ± 0,003 × 10⁻2
		0,003 × 10⁻¹-0,005 × 10⁻¹ (6)
*There is no standard, minimum or maximum error values as it is a single data point.
