# Supplementary material for: Changes in mercury content in oysters in relation to sediment and seston content in the Colombian Caribbean lagoons
Source: PeerJ. 2025 Oct 24;13:e19868. doi: 10.7717/peerj.19868 (PMC12558159; doi:10.7717/peerj.19868)
Supplement: Supplemental Information 9 — Raw data in the record of the Hg content in the water column at different coastal sites around the world. [file peerj-13-19868-s009.xlsx]

## Sheet: Hoja1
Country	Year	Location	Station	Ecosystem	Region/Sea/Oceanic	Hg (µg/L wet weight)	Author	Reference
Colombia	N/A	Ciénaga La Soledad	E1	Estuary	Caribbean	0.0005	Marrugo-Negrete and Paternina-Uribe (2011)	Marrugo-Negrete, J. L., Paternina-Uribe, R. (2011). Assessment of heavy metal contamination in the Ciénaga la Soledad and Cispatá Bay, Bajo Sinú Basin, Department of Córdoba [Spanish]. University of Córdoba, Faculty of Basic Sciences, Department of Chemistry, 121p. https://docplayer.es/12366607-Evaluacion-de-la-contaminacion-por-metales-pesados-en-la-cienaga-la-soledad-y-bahia-de-cispata-cuenca-d…
Colombia	N/A	Ciénaga La Soledad	E2	Estuary	Caribbean	0.0005	Marrugo-Negrete and Paternina-Uribe (2011)
Colombia	N/A	Ciénaga La Soledad	E3	Estuary	Caribbean	0.0005	Marrugo-Negrete and Paternina-Uribe (2011)
Colombia	N/A	Ciénaga La Soledad	E4	Estuary	Caribbean	0.0005	Marrugo-Negrete and Paternina-Uribe (2011)
Colombia	N/A	Caño Palermo	E5	Estuary	Caribbean	0.0005	Marrugo-Negrete and Paternina-Uribe (2011)
Colombia	N/A	Cispatá Bay	E6	Estuary	Caribbean	0.0005	Marrugo-Negrete and Paternina-Uribe (2011)
Colombia	N/A	Cispatá Bay	E7	Estuary	Caribbean	0.0005	Marrugo-Negrete and Paternina-Uribe (2011)
Colombia	N/A	Cispatá Bay	E8	Estuary	Caribbean	0.0005	Marrugo-Negrete and Paternina-Uribe (2011)
Colombia	N/A	Cispatá Bay	E9	Estuary	Caribbean	0.0005	Marrugo-Negrete and Paternina-Uribe (2011)
United Stades	1991	Hawaii	Hilo Bay	Coast	Pacific	0.001	Hunter et al. (1995)	Hunter CL, Stephenson MD, Tjeerdema RS, Crosby DG, Ichikawa GS, Goetzl JD, Paulson KS, Crane DB, Martin M, Newman JW. 1995. Contaminants in oysters in Kaneohe Bay, Hawaii. Marine Pollution Bulletin 30(10): 646-654. https://doi.org/10.1016/0025-326X(95)00039-P
United Stades	1991	Hawaii	Keehi Lagoon	Coast	Pacific	0.001	Hunter et al. (1995)
United Stades	1991	Hawaii	Kahana Bay	Coast	Pacific	0.001	Hunter et al. (1995)
United Stades	1991	Hawaii	Kaneohe Bay	Coast	Pacific	0.003	Hunter et al. (1995)
United Stades	1991	Hawaii	Kaneohe Bay	Coast	Pacific	0.001	Hunter et al. (1995)
United Stades	1991	Hawaii	Kaneohe MCAS	Coast	Pacific	0.001	Hunter et al. (1995)
United Stades	1991	Hawaii	Pearl Harbor	Coast	Pacific	0.001	Hunter et al. (1995)
South Korea	2009-2013	Tongyeong	Tongyeong	Coast	Tongyeong	0.001	Mok et al. (2015)	Mok JS, Yoo HD, Kim PH, Yoon HD, Park YC, Lee TS, Know JY, Son KT, Lee HJ, Ha KS, Shim, KB, Kim JH. 2015. Bioaccumulation of Heavy Metals in Oysters from the Southern Coast of Korea: Assessment of Potential Risk to Human Health. Bulletin of Environmental Contamination and Toxicology 94: 749-755. https://doi.org/10.1007/s00128-015-1534-4
South Korea	2009-2013	Tongyeong	Tongyeong	Coast	Tongyeong	0.0007	Mok et al. (2015)
South Korea	2009-2013	Tongyeong	Tongyeong	Coast	Tongyeong	0.0013	Mok et al. (2015)
South Korea	2009-2013	Tongyeong	Tongyeong	Coast	Tongyeong	0.0018	Mok et al. (2015)
South Korea	2009-2013	Tongyeong	Tongyeong	Coast	Tongyeong	0.0012	Mok et al. (2015)
South Korea	2009-2013	Tongyeong	Tongyeong	Coast	Tongyeong	0.003	Mok et al. (2015)
South Korea	2009-2013	Tongyeong	Tongyeong	Coast	Tongyeong	0.0017	Mok et al. (2015)
South Korea	2009-2013	Tongyeong	Tongyeong	Coast	Tongyeong	0.0007	Mok et al. (2015)
South Korea	2009-2013	Tongyeong	Tongyeong	Coast	Tongyeong	0.003	Mok et al. (2015)
South Korea	2009-2013	Tongyeong	Tongyeong	Coast	Tongyeong	0.0021	Mok et al. (2015)
South Korea	2009-2013	Tongyeong	Tongyeong	Coast	Tongyeong	0.0005	Mok et al. (2015)
South Korea	2009-2013	Tongyeong	Tongyeong	Coast	Tongyeong	0.0039	Mok et al. (2015)
South Korea	2009-2013	Tongyeong	Tongyeong	Coast	Tongyeong	0.0015	Mok et al. (2015)
South Korea	2009-2013	Tongyeong	Tongyeong	Coast	Tongyeong	0.0005	Mok et al. (2015)
South Korea	2009-2013	Tongyeong	Tongyeong	Coast	Tongyeong	0.0027	Mok et al. (2015)
South Korea	2009-2013	Tongyeong	Tongyeong	Coast	Tongyeong	0.0017	Mok et al. (2015)
South Korea	2009-2013	Tongyeong	Tongyeong	Coast	Tongyeong	0.0005	Mok et al. (2015)
South Korea	2009-2013	Tongyeong	Tongyeong	Coast	Tongyeong	0.0039	Mok et al. (2015)
Thailand	1983	Chao Phraya	N/A	Coast	Thailand Gulf	0	Hungspreugs et al. (1989)	Hungspreugs M, Utoomprurkporn W, Dharmvanij S, Sompongchaiyakul P. 1989. The present status of the aquatic environment of Thailand. Marine Pollution Bulletin 20(7): 327-332. https://doi.org/10.1016/0025-326X(89)90155-0
Thailand	1983	Chao Phraya	N/A	Coast	Thailand Gulf	0.43	Hungspreugs et al. (1989)
Thailand	1987	Tapi	N/A	Coast	Thailand Gulf	0.027	Hungspreugs et al. (1989)
Croatia	1976	Adriatic Sea	N/A	Coast	Adriatic Sea	0.16	Kosta et al. (1978)	Kosta L, Ravnik V, Byrne AR, Stirn J, Dermelj M, Stegnar P. 1978. Some trace elements in the waters, marine organisms and sediments of the Adriatic by neutron activation analysis. Journal of Radionalytical Chemistry 44: 317-332. https://doi.org/10.1007/BF02519624
Croatia	1976	Adriatic Sea	N/A	Coast	Adriatic Sea	0.23	Kosta et al. (1978)
Croatia	1976	Adriatic Sea	N/A	Coast	Adriatic Sea	0.02	Kosta et al. (1978)
Croatia	1976	Adriatic Sea	N/A	Coast	Adriatic Sea	0.09	Kosta et al. (1978)
Croatia	1976	Adriatic Sea	N/A	Coast	Adriatic Sea	0.09	Kosta et al. (1978)
Croatia	1976	Adriatic Sea	N/A	Coast	Adriatic Sea	0.08	Kosta et al. (1978)
Croatia	1976	Adriatic Sea	N/A	Coast	Adriatic Sea	0.07	Kosta et al. (1978)
Croatia	1976	Adriatic Sea	N/A	Coast	Adriatic Sea	0.05	Kosta et al. (1978)
Croatia	1976	Adriatic Sea	N/A	Coast	Adriatic Sea	0.13	Kosta et al. (1978)
Croatia	1976	Adriatic Sea	N/A	Coast	Adriatic Sea	0.02	Kosta et al. (1978)
Croatia	1976	Adriatic Sea	N/A	Coast	Adriatic Sea	0.21	Kosta et al. (1978)
Croatia	1976	Adriatic Sea	N/A	Coast	Adriatic Sea	0.06	Kosta et al. (1978)
Croatia	1976	Adriatic Sea	N/A	Coast	Adriatic Sea	0.05	Kosta et al. (1978)
Croatia	1976	Adriatic Sea	N/A	Coast	Adriatic Sea	0.03	Kosta et al. (1978)
Croatia	1976	Adriatic Sea	N/A	Coast	Adriatic Sea	0.07	Kosta et al. (1978)
Croatia	1976	Adriatic Sea	N/A	Coast	Adriatic Sea	0.12	Kosta et al. (1978)
Croatia	1976	Adriatic Sea	N/A	Coast	Adriatic Sea	0.09	Kosta et al. (1978)
Croatia	1976	Adriatic Sea	N/A	Coast	Adriatic Sea	0.03	Kosta et al. (1978)
Croatia	1976	Adriatic Sea	N/A	Coast	Adriatic Sea	0.1	Kosta et al. (1978)
Croatia	1976	Adriatic Sea	N/A	Coast	Adriatic Sea	0.04	Kosta et al. (1978)
Croatia	1976	Adriatic Sea	N/A	Coast	Adriatic Sea	0.02	Kosta et al. (1978)
Croatia	1976	Adriatic Sea	N/A	Coast	Adriatic Sea	0.01	Kosta et al. (1978)
China	1992	Tianjin Reserv	The Gilihai Natural	Coast	Yellow Sea	0.006	Zhang et al. (2017)	Zhang Y, Lu X, Wang N, Xin M, Geng S, Jia J, Meng Q. 2016. Heavy metals in aquatic organisms of different trophic levels and their potential human health risk in Bohai Bay, China. Environmental Science and Pollution Research 23: 17801-17810. https://doi.org/10.1007/s11356-016-6948-y
China	1992	Tianjin Reserv	The DaShentang Reserve	Coast	Yellow Sea	0.02	Zhang et al. (2017)
China	1992	Tianjin Reserv	The BinHai Wetland Reserve	Coast	Yellow Sea	0.0008	Zhang et al. (2017)
China	1992	Tianjin Reserv	The BinHai Wetland Reserve	Coast	Yellow Sea	0.0009	Zhang et al. (2017)
Italy	1980	Gombo	N/A	Coast	Mediterranean Sea	3.5	Berhnard (1988)	Berhnard M. 1998. Mercury in the Mediterranean – UNEP Regional Seas Reports and Studies No. 98. United Nations Environment Programme. https://wedocs.unep.org/handle/20.500.11822/31540
Italy	1980	Armo	N/A	Coast	Mediterranean Sea	1.7	Berhnard (1988)
Italy	1980	Tirrenia	N/A	Coast	Mediterranean Sea	2.2	Berhnard (1988)
Italy	1980	Luvorno	N/A	Coast	Mediterranean Sea	1.7	Berhnard (1988)
Italy	1980	Salvay	N/A	Coast	Mediterranean Sea	4.9	Berhnard (1988)
Italy	1980	Albegna	N/A	Coast	Mediterranean Sea	1.9	Berhnard (1988)
Italy	1980	Orbetello	N/A	Coast	Mediterranean Sea	3.6	Berhnard (1988)
Italy	1980	Livorno	N/A	Coast	Mediterranean Sea	6.3	Berhnard (1988)
Italy	1980	Gorgona Island	N/A	Coast	Mediterranean Sea	8.1	Berhnard (1988)
Italy	1980	Capraia Island	N/A	Coast	Mediterranean Sea	6.1	Berhnard (1988)
Italy	1980	Corsica	N/A	Coast	Mediterranean Sea	6.6	Berhnard (1988)
Italy	1981	Gombo	N/A	Coast	Mediterranean Sea	5.2	Berhnard (1988)
Italy	1981	Armo	N/A	Coast	Mediterranean Sea	6.8	Berhnard (1988)
Italy	1981	Tirrenia	N/A	Coast	Mediterranean Sea	2.8	Berhnard (1988)
Italy	1981	Luvorno	N/A	Coast	Mediterranean Sea	3.6	Berhnard (1988)
Italy	1981	Salvay	N/A	Coast	Mediterranean Sea	12.2	Berhnard (1988)
Italy	1981	Albegna	N/A	Coast	Mediterranean Sea	4.4	Berhnard (1988)
Italy	1981	Orbetello	N/A	Coast	Mediterranean Sea	10.5	Berhnard (1988)
Italy	1981	Livorno	N/A	Coast	Mediterranean Sea	6.5	Berhnard (1988)
Italy	1981	Gorgona Island	N/A	Coast	Mediterranean Sea	3.2	Berhnard (1988)
Italy	1981	Capraia Island	N/A	Coast	Mediterranean Sea	3.8	Berhnard (1988)
Italy	1981	Corsica	N/A	Coast	Mediterranean Sea	4.7	Berhnard (1988)
Colombia	2021	CGSM	CGS-1	Estuary	Caribbean	0.0003	Present Study
Colombia	2021	CGSM	CGS-2	Estuary	Caribbean	0.0006	Present Study
Colombia	2021	CGSM	CGS-3	Estuary	Caribbean	0.0006	Present Study
Colombia	2022	CGSM	CGS-1	Estuary	Caribbean	0.0001	Present Study
Colombia	2022	CGSM	CGS-2	Estuary	Caribbean	0.0001	Present Study
Colombia	2022	CGSM	CGS-3	Estuary	Caribbean	0.0002	Present Study
Colombia	2021	Cispatá Bay	CIS-1	Estuary	Caribbean	0.0003	Present Study
Colombia	2021	Cispatá Bay	CIS-2	Estuary	Caribbean	0.0005	Present Study
Colombia	2021	Cispatá Bay	CIS-3	Estuary	Caribbean	0.0005	Present Study
Colombia	2022	Cispatá Bay	CIS-1	Estuary	Caribbean	0.0005	Present Study
Colombia	2022	Cispatá Bay	CIS-2	Estuary	Caribbean	0.0005	Present Study
Colombia	2022	Cispatá Bay	CIS-3	Estuary	Caribbean	0.0005	Present Study
